## **Readers move their eyes mindlessly using midbrain visuo-motor principles**

**Françoise Vitu<sup>\*a</sup>, Hossein Adeli<sup>b</sup> & Gregory J. Zelinsky<sup>b,c</sup>**

<sup>a</sup> CNRS, Aix-Marseille Université, Laboratoire de Psychologie Cognitive,  
Centre St Charles, Bâtiment 9, Case D, 3 Place Victor Hugo, CS 80249,  
13331 Marseille Cedex 03, France.

<sup>b</sup> Department of Psychology, Stony Brook University,  
Stony Brook, New York 11794-2500, USA.

<sup>c</sup> Department of Computer Science, Stony Brook University,  
Stony Brook, New York 11794, USA.

*\*Correspondence should be addressed to Françoise.Vitu-Thibault@univ-amu.fr*

## 1 **Abstract**

2 Saccadic eye movements rapidly shift our gaze over 100,000 times daily, enabling countless  
3 tasks ranging from driving to reading. Long regarded as a window to the mind<sup>1</sup> and human  
4 information processing<sup>2</sup>, they are thought to be cortically/cognitively controlled movements  
5 aimed at objects/words of interest<sup>3-10</sup>. Saccades however involve a complex cerebral network<sup>11-</sup>  
6 <sup>13</sup> wherein the contribution of phylogenetically older sensory-motor pathways<sup>14-15</sup> remains  
7 unclear. Here we show using a neuro-computational approach<sup>16</sup> that mindless visuo-motor  
8 computations, akin to reflexive orienting responses<sup>17</sup> in neonates<sup>18-19</sup> and vertebrates with little  
9 neocortex<sup>15,20</sup>, guide humans' eye movements in a quintessentially cognitive task, reading.  
10 These computations occur in the superior colliculus, an ancestral midbrain structure<sup>15</sup>, that  
11 integrates retinal and (sub)cortical afferent signals<sup>13</sup> over retinotopically organized, and size-  
12 invariant, neuronal populations<sup>21</sup>. Simply considering retinal and primary-visual-cortex  
13 afferents, which convey the distribution of luminance contrast over sentences (visual-saliency  
14 map<sup>22</sup>), we find that collicular population-averaging principles capture readers' prototypical  
15 word-based oculomotor behavior<sup>2</sup>, leaving essentially rereading behavior unexplained. These  
16 principles reveal that inter-word spacing is unnecessary<sup>23-24</sup>, explaining metadata across  
17 languages and writing systems using only print size as a predictor<sup>25-26</sup>. Our findings demonstrate  
18 that saccades, rather than being a window into cognitive/linguistic processes, primarily reflect  
19 rudimentary visuo-motor mechanisms in the midbrain that survived brain-evolution pressure<sup>27</sup>.

20

## 21 **Introduction**

22 Saccades are a central component of vision in vertebrates with non-homogeneous retina,  
23 enabling high-resolution (foveal) sampling of the environment during ensuing eye fixations<sup>20</sup>.  
24 In humans, these eye movements provide the visual details necessary for performing complex  
25 cognitive tasks. An assumption, fueled by over a century of research in fields ranging from  
26 visual search to reading<sup>2</sup>, is that human oculomotor behavior is predominantly under top-down  
27 cognitive control<sup>3-10</sup>. The capacity of superior primates<sup>27</sup> to shift gaze purposely towards desired  
28 target locations arises primarily from frontal and parietal brain areas<sup>11-12</sup>. However, the superior  
29 colliculus (SC), a phylogenetically older midbrain structure<sup>15</sup>, remains a key brain hub<sup>13</sup> that  
30 relays most neo-corticothalamic fibers to the brainstem premotor circuits<sup>28</sup>, but also integrates  
31 retinal and primary-visual-cortex afferents<sup>13</sup> as in lower vertebrates<sup>14</sup>. The role of ancestral  
32 visuo-tectal tracts, besides driving reflexive saccades towards peripheral onsets<sup>17-19</sup>, remains  
33 unknown. Here we use an SC model<sup>16</sup> to investigate the extent these faster pathways<sup>13</sup>  
34 determine where humans move their eyes in a natural task, reading.

35       During reading, inter-saccadic intervals are particularly brief (averaging 225 ms<sup>2</sup>). This,  
36 together with visual-acuity limitations and letter crowding<sup>29</sup>, constrains information extraction  
37 from the periphery and creates conditions favoring default bottom-up eye-movement control.  
38 Such constraints have been largely ignored, despite evidence suggesting that peripheral word-  
39 identification processes are neither fast enough<sup>30</sup> nor necessary<sup>31-33</sup> to fully account for readers'  
40 oculomotor behavior. Most theories/models presume that saccades are guided optimally by  
41 information acquired/processed during fixations (Extended Data Table 1). In predominant  
42 word-based models, they are programmed towards the center of target word(-object)s, as  
43 determined by ongoing word-identification processes<sup>4,8</sup> and/or educated guesses/strategies  
44 combined with (coarse) peripheral preview<sup>7,9</sup>. These models however are explanatory and  
45 established on the questionable premise that readers' preferential eye-fixation patterns in

46 words/text are deliberate<sup>34</sup>. Moreover, they must assume substantial oculomotor errors, notably  
47 saccadic-range error (SRE; a bias to shift gaze a constant distance forward)<sup>35</sup> to address  
48 unexplained behavioral variability, notwithstanding evidence against such bias<sup>36</sup>.

49 MASC, our Model of Attention in the Superior Colliculus<sup>16</sup>, predicts oculomotor  
50 behavior by spatially integrating luminance-contrast signals, as conveyed by retino(-geniculo-  
51 striate)-tectal tracts (Fig. 1a; see Methods). In the SC, spatial coding is distributed over  
52 populations of neurons (point images) with large and overlapping receptive/movement fields<sup>37</sup>.  
53 Moreover, overrepresentation of space closer to the fovea is offset by increasing response-field  
54 size with eccentricity, resulting in an invariant point-image size across the visual-field  
55 representation<sup>21,38</sup>. This implies that input signals are averaged over constant-size populations,  
56 which in turn causes saccades to be biased toward the fovea-weighted spatial centroid of  
57 peripheral configurations<sup>38-40</sup>. MASC implements these SC-averaging principles over visual-  
58 and motor-point images, and uses winner-take-all to determine each new fixation location, with  
59 an inhibitory spatial tag inserted after each to simulate inhibition of saccade return (ISR)<sup>41</sup> –  
60 MASC's one fit parameter compared to the many used by top-down models.

## 61 **Results**

### 62 **Readers' oculomotor behavior is essentially mindless.**

63 Despite MASC being dumb, illiterate, and largely deterministic, its generated eye-movement  
64 behavior over sentences from the French-Sentence Corpus (FSC)<sup>31</sup> was nearly indistinguishable  
65 from the behavior of humans reading the sentences for comprehension (Fig. 1b, Supplementary  
66 Videos 1-4). MASC mainly moved from left to right, though sometimes making regressive  
67 saccades<sup>2</sup> (Fig. 2a). Compared to readers, MASC made more, and larger, regressions, but its  
68 forward saccades were just 1-letter (0.25°) shorter on average and as variable (Supplementary  
69 Tables 1-4).

70

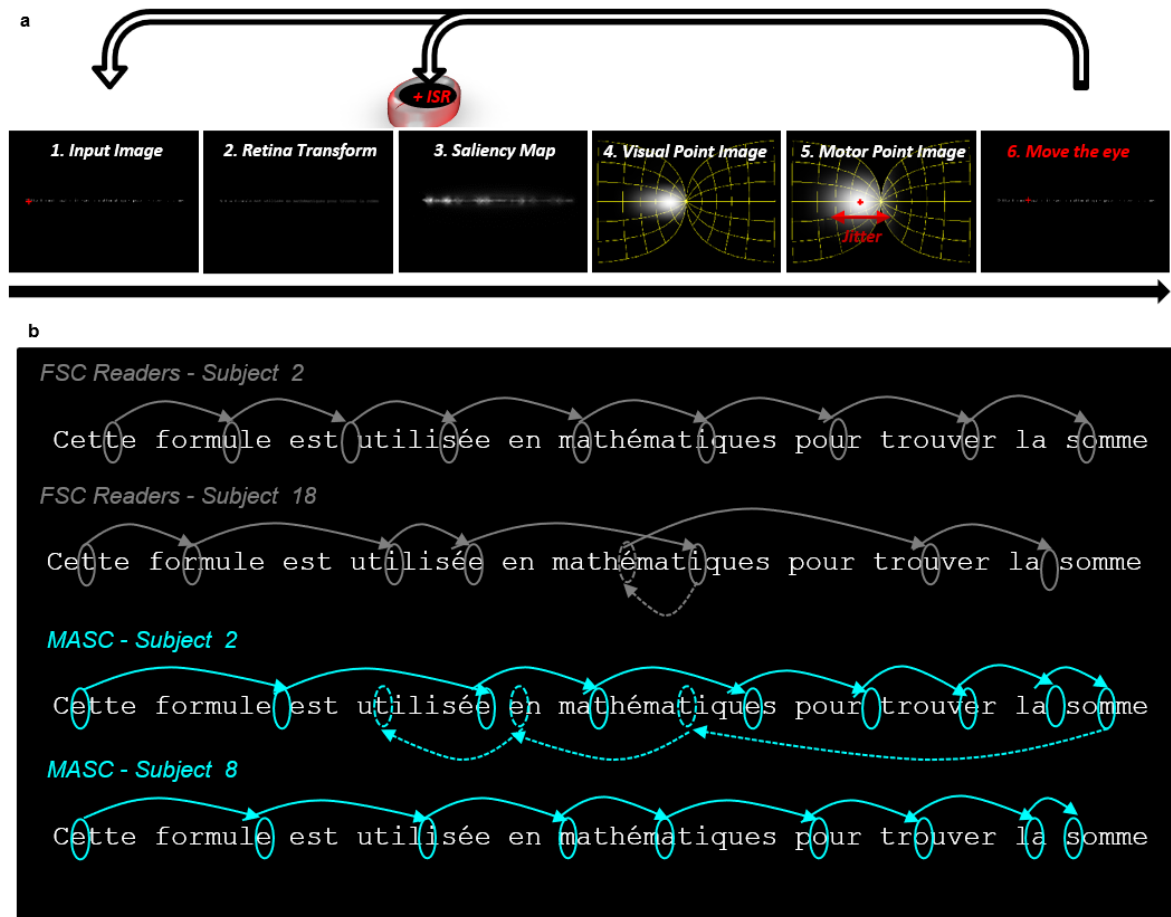

71  
72 **Figure 1 | MASC's main processing stages and its resulting reading-like behavior.** **a**, On each fixation, the  
73 input image of the sentence (Panel 1) was blurred proportional to retinal eccentricity (Retina Transform –RT; Panel  
74 2). A saliency map<sup>22</sup> (distribution of oriented luminance contrast) was computed for the image (Panel 3), and then  
75 projected into SC space (Panel 4), taking into account the SC magnification factor<sup>21</sup>. Two cascaded averaging  
76 operations were made over translation-invariant visual- and (corresponding) motor-point images in SC space  
77 (Panels 4-5). A winner-take-all process identified the maximum population activity, and after jitter over the  
78 winning population (the horizontal red arrow in Panel 5) the location of the new fixation in visual space (Panel 6)  
79 was determined using inverse, efferent, mapping<sup>21</sup>. A reading scanpath was generated by repeating this process  
80 (upper horizontal arrows) but inserting after each saccade an inhibitory spatial tag (Inhibition of Saccade Return<sup>41</sup>;  
81 ISR) in the visual-saliency map at the fixated location (red circle above Panel 3). For further details see Methods.  
82 **b**, Example eye-movement patterns from FSC readers (Subjects 2 and 18; in grey) and MASC (Subjects 2 and 8;  
83 in cyan) over a randomly chosen sentence from the FSC corpus<sup>31</sup>.  
84

85 MASC also reproduced five prototypical forward eye-movement patterns taken as  
86 evidence for top-down guidance. Two relate to *word-skipping behavior*, readers' tendency to  
87 more frequently skip words that are shorter<sup>42</sup> and nearer to the saccades' launch site<sup>32</sup>. Top-  
88 down models explain these patterns by arguing that shorter and less-eccentric words are (known  
89 to be) easier to process peripherally, making them less likely to be selected as the next saccade  
90 target<sup>4-5,7-9</sup>. MASC uses neither word-related knowledge nor top-down selection mechanisms,

91 yet it predicted a reduction in skipping rate with both increasing word length and launch-site  
92 distance (Fig. 2b-c, Supplementary Tables 5-6). MASC skipped shorter and more eccentric  
93 words slightly less than FSC readers, but it skipped words as much as readers skipped rare  
94 words in their language<sup>31</sup> and its behavior resembled humans viewing meaningless text<sup>33</sup>  
95 (Extended Data Fig. 1). MASC therefore suggests that word-identification processes only  
96 mildly modulate word-skipping rate<sup>31-32</sup>.

97 Two other benchmark phenomena characterize the distributions of initial landing  
98 positions in words. The *Preferred-Viewing-Location (PVL) effect* refers to readers' bias to  
99 fixate near the center of words, although closer to the words' beginning as word length  
100 increases<sup>43</sup>. The *launch-site effect* refers to saccades landing further into words as they originate  
101 closer to the words' beginning<sup>35</sup>. In word-based models, both phenomena reflect a word-center  
102 saccade-targeting strategy<sup>7</sup> combined with SRE<sup>4,8-9</sup>. In other visual-span models, they result  
103 from eye-movement guidance toward the location minimizing uncertainty about the word being  
104 processed<sup>5</sup>. MASC does not compute word uncertainty, and it uses neither word-based saccade-  
105 targeting mechanisms nor SRE, yet it generated both PVL and launch-site effects. Its Gaussian-  
106 shaped landing-position distributions peaked near the center of 4-letter words, and shifted  
107 towards the beginning of longer words, as in FSC readers (Fig. 2d); only its landing positions  
108 in longer words showed more variability (Supplementary Tables 7-8). Moreover, as MASC's  
109 saccades originated closer to the words' beginning, they landed closer to the words' end, or even  
110 beyond (Fig. 2e), yielding a linear relationship between launch-site distance and mean landing  
111 site. Slopes for MASC and FSC readers matched almost perfectly (Fig. 2f-g, Supplementary  
112 Tables 9-12). The tiny remaining differences, comparable in size to word-frequency effects,  
113 likely reflect language-related modulations of saccade amplitude<sup>31</sup> (Extended Data Fig. 2).

114

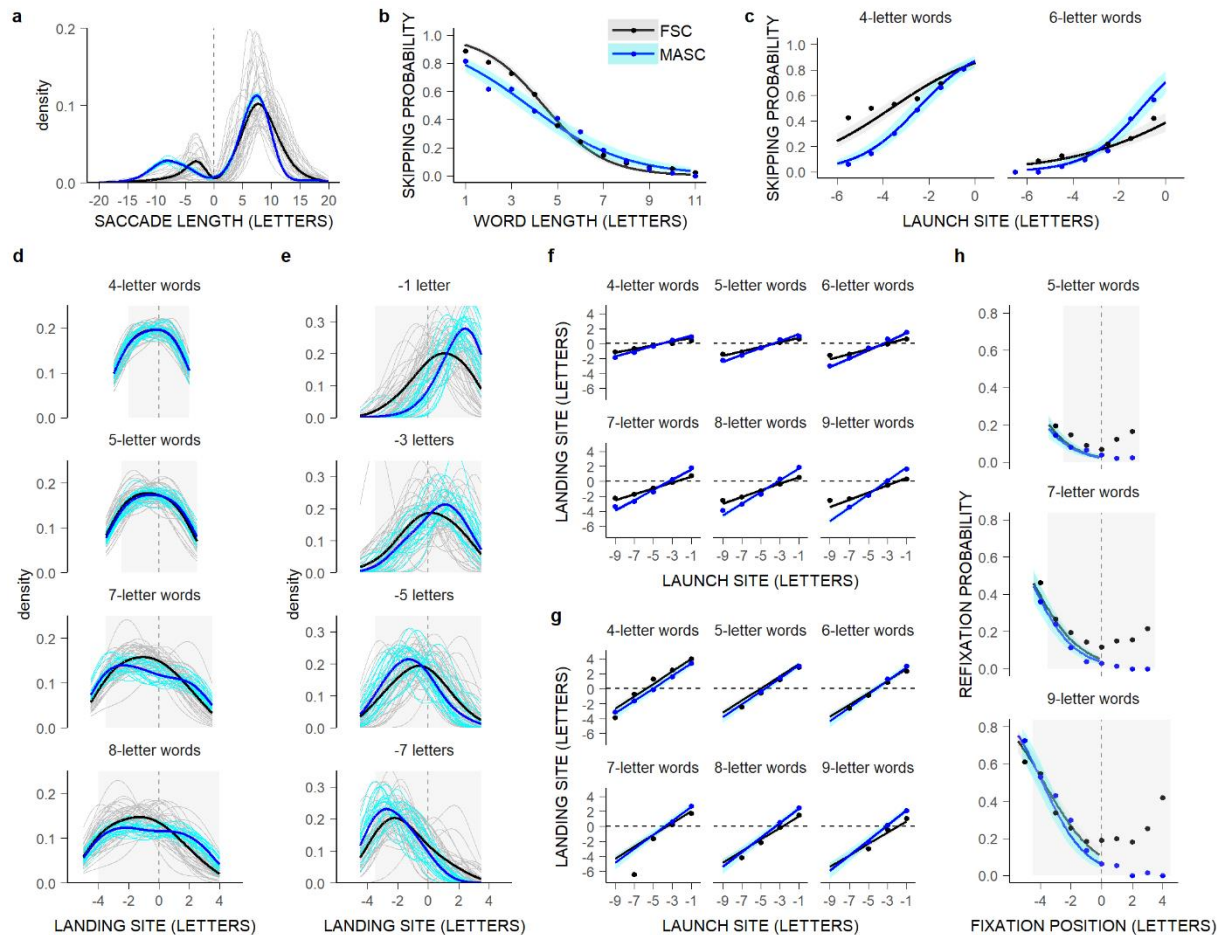

115  
116  
117  
118  
119  
120  
121  
122  
123  
124  
125  
126  
127  
128  
129  
130  
131  
132  
133  
134  
135  
136

**Figure 2 | Illiterate visuo-motor principles in the SC account for prototypical word-based eye-movement behavior during reading.** **a-h**, Comparison of the oculomotor behavior of MASC (blue/cyan) and FSC readers (black/grey), after matching both data sets for numbers of fixations (see Methods, Supplementary Methods 1). **a**, Probability density functions of saccade lengths (in letters) across and by subjects (thick and thin lines); positive/negative lengths: progressive/regressive saccades. **b,c**, Mean word-skipping probability (dots) as a function of word length (in letters; **b**), and for 4- and 6-letter words as a function of saccades' launch-site distance to the space in front of the words (in letters; **c**, left and right panels), and partial effects (lines), with 0.95 confidence intervals (bands), computed from Generalized Linear-Mixed-effects Models (GLMMs; Supplementary Tables 5-6). **d,e** Probability density functions of within-word landing positions (in letters relative to the centers of words, represented by the vertical grey lines) across and by subjects for 4-, 5-, 7-, and 8-letter words (**d**), and for 7-letter words, separately for four launch-site distances (-1, -3, -5, -7 letters; **e**), representing PVL and launch-site effects respectively; grey-filled rectangle areas represent the words' horizontal extent. **f-g**, Mean landing positions relative to the centers of 4- to 9-letter words (estimated by Gaussian-Mixture-Models (GMMs) fitted to individual landing-site distributions) as a function of launch-site distance, and partial effects, with 0.95 confidence intervals, computed from LMMs (Supplementary Tables 9-12); in **f**, within-word landing positions; in **g**, all landing positions, including also the endpoints of saccades falling short or landing beyond the words' end<sup>26,31</sup>. **h**, Mean probability of refixating 4- to 9-letter words as a function of initial fixation location (in letters relative to the words' centers), and partial effects, with 0.95 confidence intervals, computed from GLMMs for initial fixations in the first halves of words (Supplementary Table 13), representing the OVP effect. The small differences between MASC and FSC readers (**b-c**, **f-h**) are explained in Extended Data Fig. 1-3.

137 Lastly, there is the *Optimal-Viewing-Position (OVP) phenomenon*, that corresponds to  
138 the increased likelihood of immediately refixating a word, particularly a long word, when the  
139 initial fixation location deviates from the word's center<sup>7</sup>. Top-down models attribute this effect

140 to word identification being (expected to be) less efficient when the eyes deviate from the  
141 words' centers<sup>4-5,7-9</sup>. MASC is illiterate and generated no (regressive) refixations from the  
142 words' end, yet still made more refixations when landing closer to the beginning of (longer)  
143 words, reproducing nearly perfectly the left wing of typically U-shaped OVP curves (Fig. 2h,  
144 Supplementary Table 13), like readers viewing meaningless text<sup>33</sup> (Extended Data Fig. 3). This  
145 suggests that word-identification processes only partly contribute to the Refixation-OVP effect,  
146 accounting mainly for regressive (refixation) saccades. MASC indeed failed to generate  
147 regressions in additional benchmark conditions (Extended Data Fig. 4). It nevertheless captured  
148 regressions' PVL effect (Supplementary Tables 14-15), thus indicating that these are  
149 programmed following the same visuo-motor principles as forward saccades.

150 **Mindless reading behavior reflects visual-saliency averaging in SC space.**

151 Our proposal that eye-movement guidance is essentially mindless is not completely new.  
152 However, researchers advancing this view assumed, unlike us, that either readers' saccades are  
153 preprogrammed to move a constant distance forward regardless of encountered material<sup>24,34,44</sup>  
154 (Extended Data Table 1), or that eye movements are guided by visual saliency alone<sup>22</sup>. Neither  
155 of these assumptions can predict reading behavior (Fig. 3). The constant-saccade-length model,  
156 besides not generating regressive saccades, lacks the variability in amplitude needed to predict  
157 most word-based phenomena. Even visual-saliency models using the same luminance-contrast  
158 distributions as MASC failed. They generated atypical distributions of saccade lengths, having  
159 landing positions biased towards word boundaries, skipping behavior inconsistent with word  
160 length, and a too-weak/strong (left-)OVP effect, all regardless of retinal transformation (RT;  
161 reduction in visual resolution with retinal eccentricity) or Gaussian averaging over the saliency  
162 map.

163



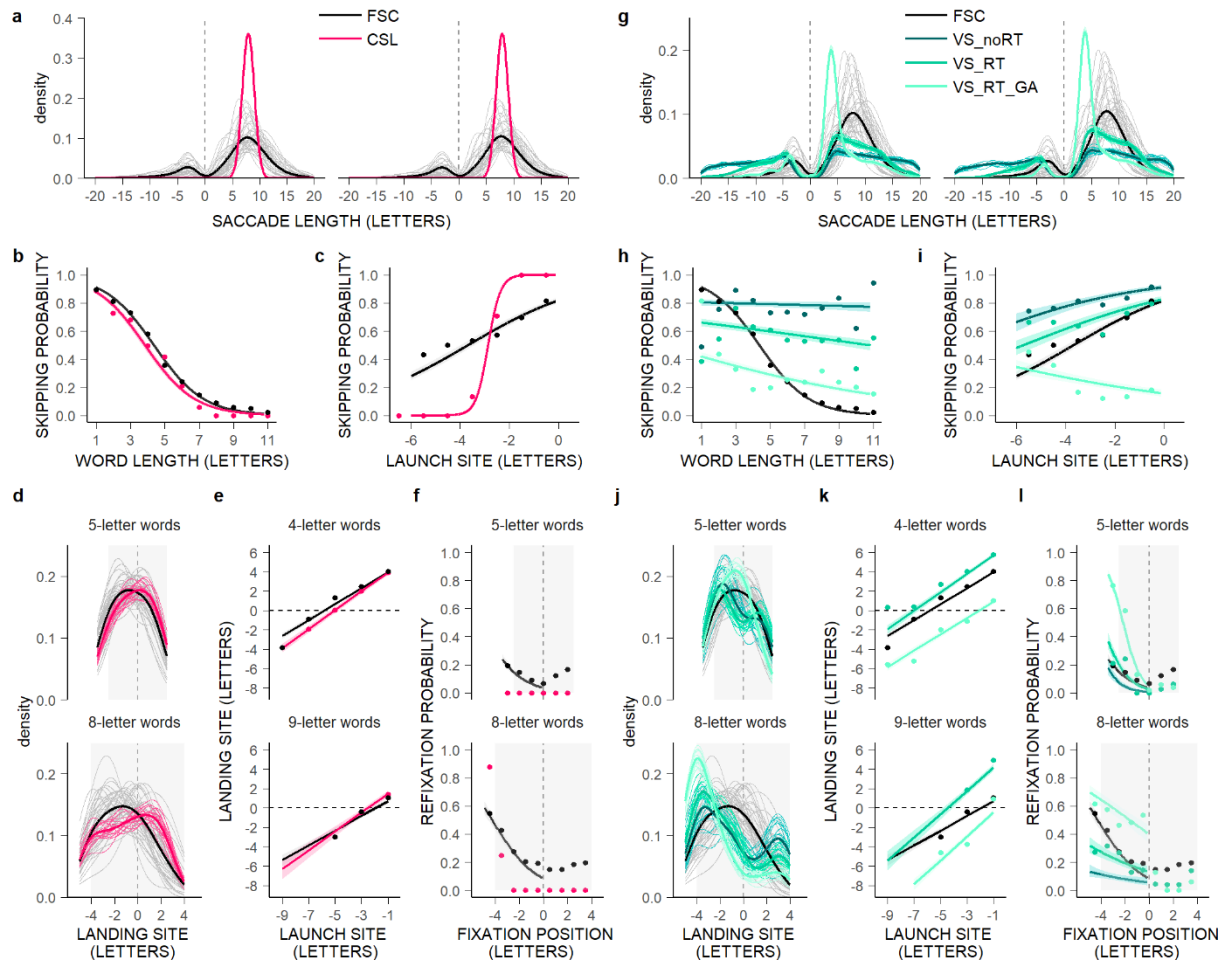

164

165 **Figure 3 | Constant-Saccade-Length and Visual-Saliency models fail to predict readers' oculomotor behavior.**

166 **a-l**, Oculomotor behavior during the first pass over sentences for the Constant-Saccade-Length model (CSL in red;  
 167 **a-f**), and for Visual-Saliency (VS) models (**g-l**) with or without RT (VS\_RT and VS\_noRT; medium and dark green)  
 168 and Gaussian Averaging (VS\_RT\_GA; light green), compared to FSC readers (black) –see Methods, Supplementary  
 169 Methods 2. **a,g**, Probability density functions of saccade lengths (in letters) across and by subjects (thick and thin  
 170 lines); left panels: for comparison, for data sets matched for numbers of fixations (Fig. 2). **b-c,h-i**, Mean probability  
 171 of word skipping (dots) as a function of word length (in letters; **b,h**), and for 4-letter words as a function of launch-  
 172 site distance to the space in front of the words (in letters; **c,i**), and partial effects (lines), with 0.95 confidence  
 173 intervals (bands), computed from GLMMs (Supplementary Tables 20-21). **d,j**, Probability density functions of  
 174 within-word landing positions (in letters relative to the centers of words; vertical grey lines) across and by subjects  
 175 for 5- and 8-letter words (the grey-filled rectangle areas). **e,k**, GMM-estimated mean of all landing positions,  
 176 in letters relative to the centers of 4- and 9-letter words, as a function of launch site distance, and partial effects,  
 177 with 0.95 confidence intervals, computed from LMMs (Supplementary Tables 26-27); VS\_noRT was excluded because  
 178 of a low  $n$  when data were split by word length and launch site. **f,l**, Mean within-word refixation probability as  
 179 a function of initial fixation location (in letters relative to the centers of words) for 5- and 8-letter words, and  
 180 partial effects, with 0.95 confidence intervals, computed from GLMMs but only for the left wing of OVP curves and  
 181 excluding CSL which made zero refixations in 4- to 6-letter words (Supplementary Table 28).

182

183 These models crucially lacked cascaded averaging of luminance-contrast signals over

184 translation-invariant visual- and motor-point images in SC space<sup>16,21</sup> (Supplementary Tables

185 16-28), principles enabling prediction of readers' stereotyped oculomotor behavior (although

186 visual- or motor-only averaging already yielded reading-like behavior; Extended Data Fig. 5).

187 MASC's other processing stages (ISR, RT, population jitter; Fig. 1) contributed, but much less  
188 than spatial saliency averaging (Extended Data Fig. 6-7).

189 **Universals of reading behavior: Print size matters, but not inter-word spacing.**

190 A challenge when modeling reading behavior is to identify principles that generalize across  
191 many existing font types, print sizes, and text formats, as well as the world's countless  
192 languages and writing systems. Existing models circumvented this challenge by taking letters  
193 as input, essentially agreeing that saccades are programmed in character coordinates regardless  
194 of print properties<sup>2,7,44</sup> and that inter-word spacing, which enables fast text segmentation into  
195 (saccade-target) word(-object)s, is all that matters<sup>4-5,7-9</sup> (Extended Data Table 1). However,  
196 these assumptions, specific to spaced Western-alphabetic languages, are controversial<sup>23-24,26</sup>  
197 and imply that Eastern, alphabetic (Thai) and ideographic (Chinese/Japanese), scripts, that lack  
198 inter-word spacing, are read using less efficient word segmentation<sup>45</sup> and/or different saccade-  
199 targeting strategies<sup>45-46</sup>, notwithstanding the universality of (most) word-based eye-movement  
200 patterns (Extended Data Fig. 8). MASC points a direction out of this impasse by suggesting  
201 that word segmentation is unnecessary, and inter-word spacing superfluous, for eye-movement  
202 guidance, and that most important is the spatial extent of the stimulus pattern(s), notably print  
203 size.

204 The assumption that *inter-word spacing* is crucial for eye-movement guidance rests on  
205 findings showing that readers make shorter forward saccades, and fixate slightly closer to the  
206 words' beginning, when spaces in normally-spaced texts/sentences are removed or filled<sup>2</sup>.  
207 These behavioral changes are commonly attributed to increased difficulty in online peripheral-  
208 word segmentation/processing and saccade targeting. However, space-filling(/removal) is  
209 prone to confounds<sup>23</sup> and effects at best speak to online foveal-word processing difficulty, being  
210 negligible when the one space following the fixated word is preserved regardless of peripheral  
211 linguistic content (Extended Data Fig. 9a-b). MASC lacks (foveal) word-identification

212 processes, and therefore was largely unaffected by removing or filling inter-word spaces in FSC  
213 sentences (Fig 4a-f, Supplementary Tables 29-35). It also replicated the greater impact of space-  
214 removal compared to space-filling manipulations, showing this is due to space withdrawal  
215 making text narrower and consequently favoring shorter saccades<sup>23</sup>. MASC thus captures the  
216 minor role that inter-word spacing plays in online eye-movement guidance.

217 *Character-print size*, unlike inter-word spacing, is thought to be unimportant for eye-  
218 movement behavior, due largely to a few influential studies reporting non-significant variations  
219 in the numbers of characters traversed with viewing distance (or angular print size)<sup>2,7,44</sup>. Yet,  
220 several studies reported significant effects of font size/type on the character count per saccade,  
221 and in all studies/languages, saccades' angular extent increased with angular print size  
222 (Extended Data Fig. 9c-d). MASC, without any re-parametrization, predicted this relationship  
223 when tested on FSC sentences at three viewing distances. It also replicated changes in word-  
224 based behavior with increasing print size<sup>25-26</sup>: less word skipping (with increasing word length  
225 and eccentricity), more refixations (due to stronger OVP effect), and landing positions (much)  
226 closer to the beginning of (longer) words (Fig 4g-l, Supplementary Tables 36-41). MASC thus  
227 captures the major role played by character size, while revealing that readers' saccades, rather  
228 than being aimed at specific (within-word) letter locations, are programmed to traverse angular  
229 distances regardless of letter/word units.

230

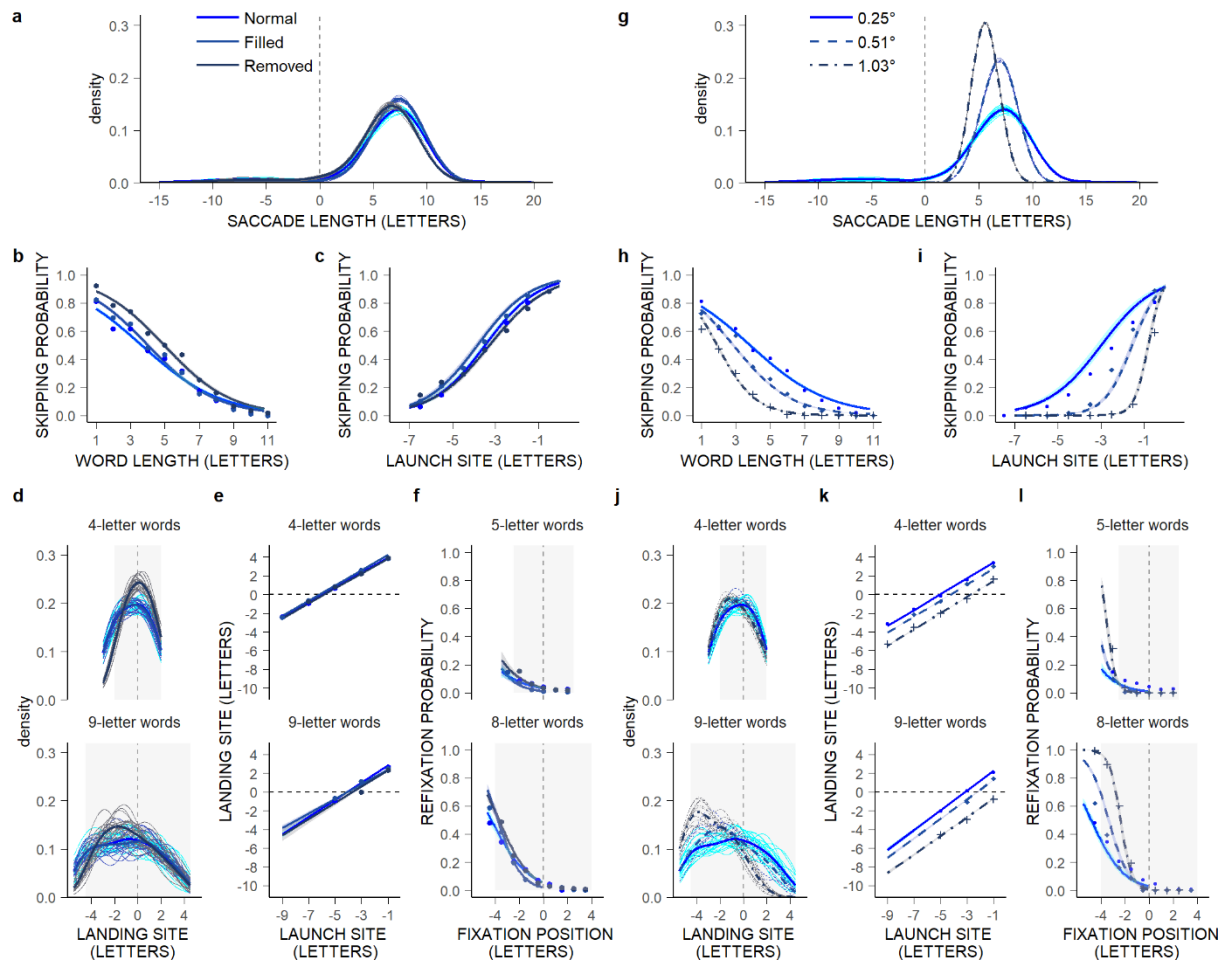

231

232 **Figure 4 | Illiterate visuo-motor principles in the SC reveal that the critical visual factor for eye-movement**  
 233 **guidance during reading is character size, not inter-word spacing.** Comparison of MASC's oculomotor behavior  
 234 over FSC sentences between three inter-word spacing conditions (a-f), i.e., normal (original condition; blue), spaces  
 235 removed (dark blue) and spaces filled (medium-dark blue), and three screen-width angles corresponding to three  
 236 angular character sizes (g-l), i.e., 0.25° (as in the original study), 0.51°, and 1.03° (solid, dashed, and dotted lines) –  
 237 see Methods, Supplementary Methods 3. **a,g,** Probability density functions of saccade lengths (in letters) across and  
 238 by subject (thick and thin lines). **b-c,h-i,** Mean probability of word skipping (dots) as a function of word length (in  
 239 letters; **b,h**), and for 4-letter words as a function of launch-site distance (in letters relative to **(c)** the beginning of  
 240 words and **(i)** the space in front of the words), and partial effects (lines), with 0.95 confidence intervals (bands),  
 241 computed from GLMMs (Supplementary Tables 31-32, 37A,38). **d,j,** Probability density functions of within-word  
 242 landing positions (in letters relative to the centers of words; vertical grey lines) across and by subjects for 4- and 9-  
 243 letter words (grey-filled rectangle areas). **e,k,** GMM-estimated mean of all landing positions, in letters relative to  
 244 the centers of 4- and 9-letter words, plotted as a function of launch-site distance, and partial effects, with 0.95  
 245 confidence intervals, computed from LMMs (Supplementary Tables 34, 40). **f,l,** Mean within-word refixation  
 246 probability as a function of initial landing positions (in letters relative to the centers of words) for 5- and 8-letter  
 247 words, and partial effects, with 0.95 confidence intervals, computed from GLMMs but only for the left wing of OVP  
 248 curves (Supplementary Tables 35, 41).

249

250 Inter-language comparisons indicate that, although *Chinese/Japanese readers* exhibit  
 251 most word-based phenomena, they skip fewer words, refixate more words, and fixate  
 252 preferentially the words' first character(s) (Extended Data Fig. 8). Researchers attribute these  
 253 patterns to a lack of inter-word spacing<sup>45</sup>, but MASC's strikingly similar behavior over spaced

254 French sentences when angular print size was multiplied by four suggests a simpler alternative  
255 –that these patterns result from Asian-language studies using character sizes two-to-four times  
256 greater and characters being the metric unit. Replotting word-skipping rate by the words’  
257 angular extent erases differences between spaced-language studies using similar-sized fonts and  
258 shows *more* skipping for Chinese readers presented with larger characters, as predicted by  
259 MASC (Extended Data Fig. 9e). Relatedly, plotting landing-position distributions for  
260 comparable angular-sized words using angular-defined bins eliminates inter-language  
261 differences, revealing only a *weaker* PVL effect in large-printed (Chinese) words, consistent  
262 with MASC’s predictions (Extended Data Fig. 9f-g). MASC therefore evidences universal  
263 visuo-motor principles that generalize across spaced and unspaced languages, while raising  
264 crucial methodological issues.

## 265 **Discussion**

266 Ancestral visuo-tectal tracts are classically regarded as purely reflexive pathways<sup>17-18,47</sup>. Their  
267 contribution to humans’ eye-movement behavior has been largely ignored under the common  
268 view that top-down cognitive control prevails<sup>3-10</sup>. Here we put these pathways back on center  
269 stage by generating reading-like oculomotor behavior over sentences using an SC model  
270 deprived of neocortical afferents<sup>16</sup>.

271 Readers move their eyes essentially forward, and in a stereotyped manner relative to  
272 word boundaries<sup>2</sup>, which existing models explain as top-down guidance to  
273 perceptually/lexically relevant locations combined with oculomotor errors/biases<sup>4-5,7-9</sup>. Our  
274 model captured these word-based phenomena, leaving mainly regressions-related behavior  
275 unexplained. This demonstrates that eye-movement behavior during reading is essentially  
276 mindless and only mildly modulated by cognitive/linguistic processes<sup>31-32,40</sup>. Relatedly, our  
277 study explains why readers’ oculomotor behavior over meaningless texts remains largely  
278 unperturbed<sup>33</sup>, which top-down models cannot explain without additional assumptions<sup>4,8</sup>. Top-

279 down models spawned the belief that word(-object) segmentation is crucial for eye-movement  
280 guidance<sup>4,7-9</sup> and consequently that Asian unspaced scripts are read more laboriously and/or  
281 differently compared to spaced texts<sup>45-46</sup>. We showed that the lack of inter-word spacing is not  
282 a limiting factor for oculomotor control<sup>23-24</sup> –Chinese/Japanese readers behave differently  
283 simply because they were tested using much-larger print sizes than spaced-language readers.  
284 Character size matters<sup>25-26</sup> but reading models taking letters as input ignore it. Our model  
285 replicated such evidence. It indicates that saccades during reading are programmed in visual-  
286 space coordinates using universal visuo-motor principles.

287         The principles we isolated involve luminance-contrast extraction in retina and V1, but  
288 the crucial step is visual-saliency averaging over constant-size visual- and motor-point images  
289 in SC space<sup>21,38</sup>. This hallmark SC visuo-motor transformation, estimated from macaque data,  
290 is what enabled our model, unlike visual-saliency models<sup>22</sup> deprived of retino/cortico-tectal  
291 projections, to reproduce readers' oculomotor behavior. This is also why our model  
292 outperformed scene-viewing models in a previous study<sup>16</sup>. Here we predicted fundamental  
293 word(/-object)-based eye-movement properties, that generalize to non-reading tasks<sup>33,48</sup> and are  
294 already present in first-grade readers<sup>49</sup>. This suggests, in line with early maturation of visuo-  
295 tectal tracts/computations<sup>19,47</sup>, that visual-saliency averaging in SC space is an inborn principle  
296 determining where, by default, primates move their eyes regardless of task. Slower  
297 cognitive/attentional control<sup>13,40</sup>, essentially via descending projections to the SC<sup>28</sup>, intervenes  
298 secondarily by modulating this default neuronal-activity pattern<sup>39-50</sup>, all depending on  
299 peripheral-processing speed and fixation duration and hence stimulus and task.

300         Phylogenetic brain reorganization afforded humans with superior attention- and  
301 oculomotor-control systems<sup>27,47</sup>, but this did not lessen the role of ancestral visuo-motor  
302 pathways<sup>14-15,17-18</sup>. We established a baseline of midbrain eye-movement control during reading  
303 against which (universal) cognitive/linguistic processes/influences can now be properly

304 studied. This baseline should inform reading education policy and provide a biomarker of visuo-  
305 motor deficits in clinical applications (low-vision, dyslexia, etc.). Future research will extend  
306 our approach to other tasks and species, to further understand the complex interplay between  
307 bottom-up and top-down oculomotor control.

## 308 **References**

- 309 1. Yarbus, A. L. *Eye Movements and Vision*. (Plenum Press, New York, 1967).
- 310 2. Rayner, K. Eye movements in reading and information processing: 20 years of research.  
311 *Psychol. Bull.* **124(3)**, 372-422 (1998).
- 312 3. Einhauser, W., Spain, M. & Perona, P. Objects predict fixations better than early saliency.  
313 *J. Vis.* **8(14):18**, 10.1167/8.14.18. (2008).
- 314 4. Engbert, R., Nuthmann, A., Richter, E. & Kliegl, R. Swift: A dynamical model of saccade  
315 generation during reading. *Psychol. Rev.* **112(4)**, 777-813 (2005).
- 316 5. Legge, G.E., Hooven, T.A., Klitz, T.S., Mansfield, J.S. & Tjan, B.S. Mr Chips 2002: new  
317 insights from an ideal-observer model of reading. *Vision Res.* **42**, 2219-2234 (2002).
- 318 6. Najemnik, J. & Geisler, W.S. Optimal eye movement strategies in visual search. *Nature*  
319 **434**, 387–391 (2005).
- 320 7. O'Regan, J.K. in *Eye movements and their role in visual and cognitive processes* (ed.  
321 Kowler, E.) 395-453 (Elsevier, Amsterdam, 1990).
- 322 8. Reichle, E.D., Rayner, K. & Pollatsek, A. The E-Z reader model of eye movement control  
323 in reading: Comparisons to other models. *Behav. Brain Sci.* **26**, 445-526 (2003).
- 324 9. Reilly, R. & Radach, R. Some empirical tests of an interactive activation model of eye  
325 movement control in reading. *Cogn. Syst. Res.* **7**, 34-55 (2006).
- 326 10. Zelinsky, G.J. A theory of eye movements during target acquisition. *Psychol. Rev.* **115**,  
327 787–835 (2008).

- 328 11. Müri, R.M. & Nyffeler, T. Neurophysiology and neuroanatomy of reflexive and volitional  
329 saccades as revealed by lesion studies with neurological patients and transcranial magnetic  
330 stimulation (TMS). *Brain Cognition* **68**, 284-292 (2008).
- 331 12. Schall, J.D. & Cohen, J.Y. in *Handbook on eye movements* (eds. Liversedge, S.P., Gilchrist,  
332 I.D., & Everling, S.) 357-379 (Oxford University Press, 2011).
- 333 13. Sparks, D.L. Translation of sensory signals into commands for control of saccadic eye  
334 movements: Role of primate superior colliculus. *Physiol. Rev.* **66(1)**, 118-171 (1986).
- 335 14. Hall, J.A., Foster, R.E., Ebner, F.F. & Hall, W.C. Visual cortex in a reptile, the turtle  
336 (*Pseustes scripta* and *Chrysemys picta*). *Brain Res.* **130**, 197-216 (1977).
- 337 15. Stein, B.E. & Gaither, N.S. Sensory representation in reptilian optic tectum: Some  
338 comparisons with mammals. *J. Comp. Neurol.* **202**, 69-87 (1981).
- 339 16. Adeli, H., Vitu, F. & Zelinsky, G.J. A model of the superior colliculus predicts fixation  
340 locations during scene viewing and visual search. *J. Neurosci.* **37(6)**, 1453-1467 (2017).
- 341 17. Schiller, P.H., Sandell, J.H., & Maunsell, J.H.R. The effect of frontal eye field and superior  
342 colliculus lesions on saccade latencies in the Rhesus monkey. *J. Neurophysiol.* **57(4)**, 1033-  
343 1049 (1987).
- 344 18. Braddick, O. et al. Possible blindsight in babies lacking one cerebral hemisphere. *Nature*  
345 **360**, 461–463 (1992).
- 346 19. Wallace, M.T., McHaffie, J.G. & Stein, B.E. Visual response properties and visuotopic  
347 representation in the newborn monkey superior colliculus. *J. Neurophysiol.* **78(5)**, 2732-  
348 2741 (1997).
- 349 20. Land, M.F. in *Handbook on eye movements* (eds. Liversedge, S.P., Gilchrist, I.D., &  
350 Everling, S.) 3-15 (Oxford University Press, 2011).
- 351 21. Ottes F.P., van Gisbergen J.A. & Eggermont J.J. Visuomotor fields of the superior  
352 colliculus: a quantitative model. *Vision Res.* **26**, 857– 873 (1986).



- 353 22. Itti, I. & Koch, C. Computational modeling of visual attention. *Nat. Rev. Neurosci* **2**, 194-  
354 203 (2001).
- 355 23. Epelboim, J., Booth, J.R. & Steinman, R.M. Much ado about nothing: the place of space  
356 in text. *Vision Res.* **36(3)**, 465-470 (1996).
- 357 24. Yang, S.-N. & McConkie, G.W. Saccade generation during reading: Are words necessary?  
358 *Eur. J. Cogn. Psychol.* **16(1/2)**, 226-261 (2004).
- 359 25. Shu, H., Zhou, W., Yan, M. & Kliegl, R. Font size modulates saccade-target selection in  
360 Chinese reading. *Atten. Percept. Psychophys.* **73**, 482–490 (2011).
- 361 26. Yao-N'Dré, M., Castet, E. & Vitu, F. Inter-word eye behavior during reading is not  
362 invariant to character size: Evidence against systematic saccadic range error in reading.  
363 *Vis. Cogn.* **22(3-4)**, 415-440 (2014).
- 364 27. Kaas, J.H. The evolution of brains from early mammals to humans. *WIREs Cogn Sci.* **4**,  
365 33–45 (2013).
- 366 28. Hanes, DP & Wurtz, RH. Interaction of the frontal eye field and superior colliculus for  
367 saccade generation. *J. Neurophysiol.* **85(2)**, 804-815 (2000).
- 368 29. Legge, G.E., Mansfield, J.S. & Chung, S.T.L. Psychophysics of reading XX. Linking letter  
369 recognition to reading speed in central and peripheral vision. *Vision Res.* **41**, 725-743  
370 (2001).
- 371 30. Chanceaux, M., Vitu, F., Bendahman, L., Thorpe, S. & Grainger, J. Word Processing Speed  
372 in Peripheral Vision Measured with a Saccadic Choice Task. *Vision Res.* **56**, 10-19 (2012).
- 373 31. Albregues, C., Lavigne, F., Aguilar, C., Castet, E. & Vitu, F. Linguistic processes do not  
374 beat visuo-motor constraints, but they modulate where the eyes move regardless of word  
375 boundaries: Evidence against top-down word-based eye-movement control during reading.  
376 *PLoS ONE* **14(7)**, e0219666 (2019).

- 377 32. Brysbaert, M., & Vitu, F. in *Eye guidance in reading and scene perception* (ed.  
378 Underwood, G.) 125-147 (Elsevier Science Ltd, Oxford, 1998).
- 379 33. Vitu, F., O'Regan, J.K., Inhoff, A. & Topolski, R. Mindless reading: Eye movement  
380 characteristics are similar in scanning strings and reading texts, *Percept. Psychophys.* **57**,  
381 352-364 (1995).
- 382 34. Dodge, R. An experimental study of visual fixation. *Psychol. Rev-Monogr. S.* **4**, 1-95  
383 (1907).
- 384 35. McConkie, G.W., Kerr, P.W., Reddix, M.D. & Zola, D. Eye movement control during  
385 reading: I. The location of initial eye fixations on words. *Vision Res.* **28(10)**, 1107-1118  
386 (1988).
- 387 36. Nuthmann, A., Vitu, F., Engbert, R. & Kliegl, R. No evidence for a saccadic range effect  
388 in visually guided and memory-guided saccades in simple saccade-targeting tasks. *PLoS*  
389 *ONE* **11(9)**, e0162449 (2016).
- 390 37. McIlwain, J.T. Distributed spatial coding in the superior colliculus: A review. *Visual*  
391 *Neurosci.* **6**, 3–13 (1991).
- 392 38. Vitu, F., Casteau, S., Adeli, H., Zelinsky, G.J. & Castet, E. The magnification factor  
393 accounts for the greater hypometria and imprecision of larger saccades: Evidence from a  
394 parametric human-behavioral study. *J. Vis.* **17(4):2**, 10.1167/17.4.2. (2017).
- 395 39. Findlay, J.M. & Walker, R. A model of saccade generation based on parallel processing  
396 and competitive inhibition. *Behav. Brain Sci.* **22(4)**, 661-720 (1999).
- 397 40. Vitu, F. About the global effect and the critical role of retinal eccentricity: Implications for  
398 eye movements in reading. *J. Eye Movement Res.* **2(3), 6**, 10.16910/jemr.2.3.6 (2008).
- 399 41. Klein, R.M & Hilchey, M.D. in *Handbook on eye movements* (eds. Liversedge, S.P.,  
400 Gilchrist, I.D., & Everling, S.) 471-492 (Oxford University Press, 2011).

- 401 42. Rayner, K. & McConkie, G.W. What guides a reader's eye movements? *Vision Res.* **16**,  
402 829-837 (1976).
- 403 43. Rayner, K. Eye guidance in reading: Fixation location within words. *Perception* **8**, 21-30  
404 (1979).
- 405 44. Huey, E.B. *The Psychology and Pedagogy of Reading*. (Macmillan, New York, 1908).
- 406 45. Yan, M., Kliegl, R., Richter, E.M., Nuthmann, A. & Shu, H. Flexible saccade-target  
407 selection in Chinese reading. *Q. J. Exp. Psychol.* **63**, 705–725 (2010).
- 408 46. Liu, Y., Reichle, E.D. & Li, X. The effect of word frequency and parafoveal preview on  
409 saccade length during the reading of Chinese. *J. Exp. Psychol. Hum. Percept. Perform.* **42**,  
410 1008–1025 (2016).
- 411 47. Luna, B., Velanova, K. & Geier, C.F. (2008). Development of eye-movement control.  
412 *Brain Cogn.* **68**, 293-308.
- 413 48. Nuthmann, A. & Henderson, J.M. Object-based attentional selection in scene viewing. *J.*  
414 *Vis.* **10(8):20**, 10.1167/10.8.20. (2010).
- 415 49. McConkie, G.W. et al. in *Vision and visual dyslexia* (ed. Stein, J.F.) 251-262 (Macmillan  
416 Press, London, 1991).
- 417 50. Sheinberg, D. & Zelinsky, G.J. in *Perception and cognition: Advances in eye movement*  
418 *research* (eds. d'Ydewalle, G. & Van Rensbergen, J.) 333-348 (North-Holland,  
419 Amsterdam, New-York, 1993).
- 420

## 421 **Methods**

422 **MASC implementation.** MASC is a neuro-computational model that takes pixels as input (i.e.,  
423 image-based). Here it was nearly identical to MASC applied to the free viewing of natural  
424 scenes<sup>16</sup>. MASC predicted each new fixation location over sentences by going through the  
425 following sequence of processing stages (Fig. 1a): (1) *RT*, the blurring of the input image to  
426 simulate the gradual reduction in visual resolution with increasing retinal eccentricity  
427 (svistoolbox-1.0.5 Space Variant Imaging System; <http://svi.cps.utexas.edu/software.shtml>)<sup>51</sup>;  
428 (2) *Computation of a priority (here a visual-saliency) map* based on extraction of feature (hue,  
429 luminance and orientation) contrast at different spatial scales (GBVS toolbox;  
430 <http://www.vision.caltech.edu/~harel/share/gbvs>)<sup>52</sup>; (3) *Projection of this saliency map into SC*  
431 *space*, i.e., a two-dimensional array of retinotopically arranged and equally-spaced visually-  
432 responsive neurons with large receptive fields (as in superficial and intermediate SC layers<sup>53-</sup>  
433 <sup>55</sup>), which, due to the non-homogeneity of afferent projections, produces an overrepresentation  
434 of space closer to the fovea<sup>21</sup>; (4) *Cascaded averaging*<sup>56</sup> of resulting activity over translation-  
435 invariant neuronal populations (or point images<sup>57-60</sup>), first in the visual map and then in a  
436 spatially-registered motor map<sup>61</sup>, implemented here by the projection of averaged visual  
437 activity onto a topographic layer of equally-spaced neurons having large movement fields (as  
438 in the intermediate and deeper SC layers<sup>55,62-63</sup>); (5) *Winner-take-all process* to identify the  
439 most active motor population; (6) *Location jitter*<sup>64</sup> applied to the winning population (the only  
440 step not in MASC's free-viewing version); (7) *Conversion back to visual space*, using an inverse  
441 efferent mapping<sup>21</sup> to determine the next fixation location; and (8) *ISR*<sup>41</sup>, here defined as  
442 inhibition injected into the saliency map to prevent returning to image locations that were  
443 already fixated.

444 As further detailed in our original model paper<sup>16</sup>, projection of the visual-saliency map  
445 into SC space was done using an anisotropic logarithmic afferent-mapping function, as

446 estimated in the monkey<sup>21</sup>. The diameter and sigma of the Gaussian window used for  
447 computation of visual- and motor-point images were fixed and estimated directly from monkey  
448 electrophysiological data<sup>65</sup>. Population-location jitter was rotation-symmetrical and had a  
449 sigma and diameter corresponding to ~13% of motor-point images' sigma and diameter, as  
450 previously estimated based on saccade-endpoint scatter in humans<sup>64</sup>. Given the SC  
451 magnification factor, this meant that larger saccades were more variable in size, as shown in  
452 saccade-targeting tasks<sup>38,64</sup> and as also reported during reading<sup>35</sup>. Both the width and sigma of  
453 the ISR window were adjusted, by testing a range of diameter (1.07°-2.12°) and sigma (0.22°-  
454 0.90°) values (Extended Data Fig. 6g-l). The parameter pairs yielding the most reasonable fit  
455 of the observed distribution of saccade lengths were first selected. Then, the one yielding the  
456 best fit of word-skipping behavior, and PVL, launch-site, and refixation-OVP effects, was  
457 retained. The selected ISR window, used for all the simulations, had a diameter of 1.82° and a  
458 sigma of 0.37°, corresponding to 7.28 and 1.48 letters subtending 0.25° each.

459 **MASC dissection and model comparison.** To determine the contribution of each processing  
460 step in MASC's behavior, we first implemented six amputated versions of the model, each  
461 containing all of MASC's processing steps, except for: (1) RT (MASC\_noRT), (2) averaging  
462 over motor-point images (MASC\_VISUAL), (3) averaging over visual-point images  
463 (MASC\_MOTOR), (4) averaging over both visual- and motor-point images, in which case  
464 MASC turned into a pure Visual-Saliency (VS) model with RT (VS\_RT), (5) averaging over  
465 both visual- and motor-point images and RT (VS\_noRT), or (6) jitter over the winning  
466 population (MASC\_noJITTER). Additionally, to estimate the contribution of cascaded  
467 averaging over translation-invariant visual- and motor-point images in SC space, we  
468 implemented four additional VS\_RT models that applied Gaussian averaging (GA) directly to  
469 the saliency map (VS\_RT\_GA1-4) using windows of variable diameter and sigma (0.31°,  
470 0.15°; 0.62°, 0.30°; 1.22°, 0.60°; 2.42°, 1.20°). Since the first three models gave results that

471 were either similar to VS\_RT or somewhere in between VS\_RT and VS\_RT\_GA4, only the  
472 simulation results for VS\_RT\_GA4 are reported; this is referred to as VS\_RT\_GA.

473 Finally, we estimated the contribution of long-lasting ISR in MASC, using two  
474 additional model variants, one with ISR applied only to the current fixation (MASC\_ISR\_C)  
475 and another with ISR applied to both the current and the immediately prior fixations  
476 (MASC\_ISR\_1PC). Moreover, we implemented a Constant-Saccade-Length (CSL) model, one  
477 making exclusively forward saccades of nearly constant amplitude ( $1.75^\circ$ , or 7 letters, the mean  
478 length of MASC's forward saccades –Supplementary Table 4, with Gaussian noise of diameter  
479  $0.21^\circ$  and  $\sigma 0.105^\circ$ ). This allowed us to assess whether visual input is at all necessary to  
480 predict readers' eye-movement behavior, while providing a definitive test of the previously  
481 proposed saccade-preprogramming hypothesis<sup>24,44,66</sup>.

482 **The French Sentence Corpus (FSC).** The FSC, created to investigate the influence of visual  
483 and linguistic variables on eye movements during reading, comprised a total of 316 pairs of  
484 one-line sentences read silently by 40 French-native adults whose eye movements were  
485 recorded with a Dual-Purkinje-Image Eye-Tracker (Ward Technical Consulting)<sup>31</sup>. The two  
486 sentences of a pair differed by a single word (the second word), that was either semantically  
487 related or unrelated to a following test word of variable frequency and length. The total set of  
488 632 sentences was split into two lists of 316 sentences, each containing only one exemplar of a  
489 sentence pair, and an equal number of predictable and unpredictable sentences. Each participant  
490 saw only one list, and hence only one exemplar of each sentence pair, but all sentences were  
491 seen across all participants (Latin-Square Design). Note that, as in a main series of analyses of  
492 the original FSC study, all words in the sentences (that corresponded to our selection criteria –  
493 see Data Selection and Analyses), and not only the test words, were considered for analysis;  
494 this increased the number of observations per cell, and hence statistical power, without

495 changing observed eye-movement patterns<sup>31</sup>. The properties of sentences and words are  
496 detailed in the original paper<sup>31</sup>.

497 Sentences, saved as bitmaps, were displayed one at a time on a gamma-corrected 21”  
498 CRT monitor, at a screen resolution of 1280×960 pixels. Each sentence appeared on the vertical  
499 midline of the screen, with its second character aligned with a previously displayed fixation bar  
500 in the left part of the screen. Each character space subtended 0.25 degrees of visual angle at a  
501 distance of 118 cm from the participants' eyes. Each sentence remained on screen until the  
502 participant pressed a button, thus allowing sentence rereading at will. Comprehension was  
503 enforced by semantic-content questions presented randomly after 20% of the sentences (96%  
504 correct responses on average).

505 All participants in the FSC study gave their written informed consent prior to their  
506 participation in the experiment, that was conducted in accordance with the ethical standards  
507 laid down in the Declaration of Helsinki. This research was approved by the committee  
508 responsible for overseeing research conducted in human subjects at Aix-Marseille University  
509 (Comité d'éthique de l'université d'Aix-Marseille; Pierre-Jean Weiller, President).

510 **Model simulations.** Both lists of 316 sentences from the FSC were input ten times to all models  
511 in our comparison set, except MASC\_noJITTER (where multiple inputs were unnecessary),  
512 thus yielding a total of 20 runs per model. For each sentence, a given model generated saccades  
513 to bitmap locations until: (1) the buildup of ISR emptied activity on the visual-saliency map  
514 (for MASC and VS models), (2) there were less than about seven characters to the right of  
515 fixation (for CSL), or (3) a maximum of 20 fixations was reached. This 20-fixation termination  
516 criterion was determined empirically based on the number of fixations per sentence in FSC  
517 readers (mean: 11.63; 4.07-26.82), which was distributed normally when the few occurrences  
518 with more than 20 fixations (7.1% on average), typically associated with eye blinks and/or false  
519 tracks, were excluded. It was an upper bound ensuring that simulated and observed data sets

520 could be matched for numbers of fixations or at least first-pass behavior over sentences (see  
521 Data selection and analysis). Accordingly, most models generated on average more fixations  
522 per sentence than FSC readers (MASC\_IOR\_1PC, MASC\_IOR\_C: 20; MASC, MASC\_noRT,  
523 MASC\_noJITTER: 19.99; MASC\_MOTOR: 18.18; VS\_noRT: 17.00; VS\_RT: 16.03;  
524 MASC\_VISUAL: 15.76). VS\_RT\_GA and CSL still made fewer fixations on average (10.47  
525 and 6.81 respectively).

526 For the main set of simulations, the screen width angle was set to  $20^\circ$ , such that each  
527 character subtended about 0.25 degree of visual angle, as for FSC readers. However, to explore  
528 the role of character size, two additional width angles were tested ( $40^\circ$  and  $80^\circ$ ), so that each  
529 character subtended about  $0.51^\circ$  and  $1.03^\circ$  respectively. Additionally, to determine MASC's  
530 predicted effect of inter-word spacing, FSC bitmaps were regenerated after removing or filling  
531 with x's inter-word spaces in the corresponding sentences.

532 **Data selection and analysis.** Simulated and observed oculomotor behavior were compared  
533 across the two lists of sentences from the FSC corpus. MASC was first opposed to FSC readers  
534 only to keep the comparison simple and directly test whether MASC predicted readers'  
535 oculomotor behavior (Supplementary Methods 1). Then, comparison models were opposed to  
536 MASC and FSC readers to identify MASC's critical processing steps (Supplementary Methods  
537 2). Because the numbers of fixations per sentence differed between MASC and FSC readers  
538 and between MASC and other data sets, we implemented two different data-matching  
539 procedures respectively. The first procedure, for comparison between MASC and FSC readers,  
540 matched data sets for numbers of fixations. For a given sentence and model run, the number of  
541 fixations considered for analysis was determined by randomly sampling from the distribution  
542 of the numbers of fixations per sentence for FSC readers in the corresponding sentence pair  
543 (but excluding marginal trials with more than 20 fixations –see Model Simulations). The second  
544 procedure, used for model comparison, matched data sets for behavior by selecting the fixations



545 made during the first pass over a sentence (i.e., all fixations from the start of reading a sentence  
546 until a regression or button press following the first eye pass on the rightmost fixated word).  
547 Compared to random sampling, this procedure more greatly reduces the number of fixations  
548 considered for analysis, but it allows comparison of the oculomotor behavior over a sentence  
549 before re-reading, regardless of how many fixations were necessary to achieve this behavior; it  
550 also allows fairer comparison with CSL, which made fewer fixations and never generated  
551 regressions.

552 For both comparison sets, exclusion criteria from the original FSC study<sup>31</sup> were applied  
553 to the data. Specifically, fixations were excluded if they were (1) preceded or followed by an  
554 eye blink or other signal irregularity (which biases estimation of the fixation location; for FSC  
555 data only), (2) more than 1° above or below the screen midline where the sentence was  
556 displayed (and possibly unrelated to sentence reading), (3) preceded by a fixation more than 1°  
557 above/below the midline, (4) the last fixation on the line (biased by subsequent button press),  
558 or (5) preceded by a fixation that was the first fixation on the line (biased by fixation behavior  
559 on the prior fixation stimulus).

560 In saccade-length analyses, we measured the horizontal amplitude and direction of the  
561 saccade immediately preceding a selected fixation. Saccades launched from either the first or  
562 the last word in the sentence were excluded from analysis so as not to bias estimations of  
563 regression rate and forward/regressive saccade length; a few saccades greater than +/-20 letters  
564 were also identified and excluded. In word-based analyses, we measured the location of the  
565 selected fixation relative to the boundaries of a given critical word, either: (1) the word  
566 immediately to the right of the word from which the prior saccade was launched in both word-  
567 skipping and overall landing-position analyses (thus measuring whether the fixation was  
568 beyond the word's end, and where it was located relative to the word's center, respectively),  
569 (2) the fixated word in within-word landing-position analyses, or (3) the word the prior saccade

570 was launched from in refixation-probability analyses (thus measuring whether the fixation  
571 remained on the word). Instances when the critical word was either the first or the last word in  
572 the sentence, or a word preceded or followed by punctuation, were excluded to avoid screen-  
573 border and beginning/end-sentence effects as well as underestimation of visual word length.  
574 Furthermore, to restrict our analyses to first-pass behavior on words (as classically done), cases  
575 were rejected when the critical word was previously fixated and the critical fixation in word-  
576 skipping and landing-position analyses, or the fixation prior to the critical fixation in refixation  
577 analyses, was neither a fixation preceded by a forward saccade nor the very-first fixation on a  
578 word. The number of cases that remained after these selections varied depending on the analysis  
579 and is reported in the Supplementary Tables' legends.

#### 580 **Gaussian-mixture modeling of saccade-length and landing-position distributions.**

581 Saccade-length and landing-position distributions were first visualized by plotting for each data  
582 set, individual and condition, corresponding probability density functions, with fixed 1-letter  
583 (0.25°) bandwidth and Gaussian kernel. Since several of the distributions had several modes,  
584 GMMs were first fitted to the data, using the *mclust* package (Version 5.2)<sup>67</sup> in R (Version R-  
585 3.1.3)<sup>68</sup>. These provided an estimate of the number of mixture components in each of the  
586 distributions, as well as an estimate of the mean, variance, and proportion of cases (“*k*”) for  
587 each detected mode.

588 GMMs searched for 1 to 4 and 1 to 3 mixture components (“*G*” parameter) in saccade-  
589 length and landing-position distributions respectively; these numbers of components were  
590 motivated by the shape of the most irregular distributions, those generated by VS models. To  
591 optimize GMM fitting, we used a prior having three parameters: mean, scale, and shrinkage<sup>67</sup>.  
592 For a given data set, individual and condition, the mean and scale parameters were fixed. The  
593 mean parameter corresponded to the default-prior mean, that is the mean of saccade lengths or  
594 landing positions for this data set, individual and condition, unless this prevented an optimal

595 fit; For saccade-length distributions, the mean parameter was set to an extreme negative value  
596 (-25 letters) to capture the often very-small mode associated with regressive saccades. The scale  
597 parameter, which was defined separately for each tested  $G$  value, corresponded to the default-  
598 prior scale, meaning the variance in saccade lengths, or landing positions, in the data set,  
599 individual and condition, divided by squared  $G$ . The shrinkage parameter for the prior on the  
600 mean was tuned over a range of shrinkage values (from 0.01, the default prior-shrinkage value,  
601 to 18).

602 Selection of the optimal model for a given data set, individual and condition was done  
603 in three steps. First, models were excluded for having more than one mixture component if: (1)  
604 the difference between the estimated means of adjacent modes was less than (or equal to) a  
605 given threshold (4.5 and 3.2 letters in saccade-length and landing-position analyses  
606 respectively), (2) there was no mixture component with a negative mean (only in saccade-length  
607 analyses and for the data sets containing regressive saccades, thus not CSL), or (3) the  $k$ -value  
608 of one of the mixture components was not greater than 0.3 (only in landing-position analyses).  
609 These empirically determined selection criteria reflect a compromise to capture the  
610 bi(tri)modality in the VS-models' distributions and to reproduce two well-established findings  
611 from the literature, also present in FSC readers: (1) that saccade-length distributions are  
612 typically bimodal (with both a negative and a positive peak associated respectively with  
613 regressive and progressive saccades)<sup>2</sup>, and (2) that landing-position distributions are typically  
614 unimodal<sup>35,43</sup>. Moreover,  $k$  was set to a value greater than 0.3 in landing-position analyses to  
615 ensure that a given mixture component contained a reasonable minimal number of observations;  
616 these analyses, particularly when data were split by word length and launch site, relied on a  
617 much lower  $n$ . Conversely, having no  $k$ -threshold in saccade-length analyses meant that the  
618 often very small proportion of regressive saccades would be modeled. Second, the model with  
619 the maximal BIC (Bayesian Information Criterion<sup>69</sup>) value across the tested range of shrinkage-

620 parameter values was selected separately for each G-value. Third, the model that was retained  
621 had by default two components in saccade-length analyses and a single component in landing-  
622 position analyses, unless there was strong evidence that a more complex (or a simpler) model  
623 better fitted the data, meaning that the BIC value was greater than that associated with the  
624 default model and the difference in BIC values was greater than  $6^{70}$ .

625 The distributions were then compared between data sets (and conditions), using  
626 parameter estimates from the corresponding optimal GMM models (Supplementary Methods  
627 1-2, Supplementary Tables 1-4,7-12,14-19,22-27). First, to assess whether MASC and other  
628 comparison models reproduced readers' typically unimodal and bimodal distributions of  
629 landing positions and saccade lengths respectively, two indexes were compared: (1) the  
630 proportion of 1-3 and 1-4 mixture components respectively, and (2) the proportion of cases  
631 belonging to the largest mixture component (i.e., the value of the highest  $k$  estimate; 1 in  
632 unimodal distributions) or, for saccade-length distributions, the ratio between the highest  $k$   
633 estimate and the sum of  $k$  estimates separately for negative and positive modes. These first  
634 comparisons yet remained descriptive due to these indexes showing floor or ceiling effects in  
635 several data sets. However, they were completed, for saccade-length distributions, by statistical  
636 comparisons of the regression rate, estimated by summing all  $k$  estimates associated with a  
637 negative mode. Moreover, to determine whether the main part of the distributions was aligned  
638 between data sets and conditions, and showed comparable spread, both the mean and the  
639 standard deviation (SD) of the largest mixture component (that with the highest  $k$  value) were  
640 submitted to statistical tests, but separately for regressive and progressive saccades in saccade-  
641 length analyses.

642 **(Generalized) Linear (Mixed Effect) modeling.** To statistically compare the behavior of FSC  
643 readers and MASC, and to determine whether MASC outperformed the other models in our  
644 comparison set, (G)LMMs were fit to the data using the *(g)lmer* functions in the *lme4* package

645 (Version 1.1-7)<sup>71</sup> in R (Version R-3.1.3)<sup>68</sup>. GLMMs are logistic models that fit the probability  
646 distribution of binary data. Here, they were used to estimate word-skipping and within-word  
647 refixation rates. LMMs were fit to the GMM-estimated mean and SD of the largest mixture  
648 component in landing-position analyses. However, for GMM-estimated mean and SD of  
649 saccade lengths, as well as the proportion of regressive saccades, (G)LMs were fit to the data,  
650 because there was only one observation per subject.

651 (G)LMMs were implemented after checking the linearity of the relationship between  
652 each dependent variable and its predictors, leading us to remove extreme predictor values that  
653 were associated with a low  $n$  or yielded floor/ceiling effects. The default random structure  
654 included a random intercept by subject (and by sentence pair and word in word-skipping and  
655 refixation analyses) and random effects of all explanatory variables (except Data Set) by  
656 subject. If the model did not converge, simpler random structures were tested until convergence  
657 was attained: first, the random intercept by word, and then by sentence pair, was removed, and  
658 then random effects by subjects were progressively removed, but each time after testing the  
659 model with and without the correlation between random effects. The fixed structure included  
660 Data Set as a categorical predictor and other explanatory variables, as well as all interactions.  
661 When possible, explanatory variables were entered as continuous variables centered on their  
662 mean.

663 (G)L(M)M estimates are presented in Supplementary Tables 3-6,8,10,12-13,15,17-  
664 21,23,25,27-28, with the models' random and fixed structures in the tables' legend; fixed effects  
665 are described and commented in Supplementary Methods 1-2. The exact number of degrees of  
666 freedom for the  $t$ -values of fixed effects in LMMs remains undetermined. However, given the  
667 large number of observations, subjects, and items entering our analyses,  $t$ -distributions  
668 converged to a normal distribution. Therefore, we considered as significant, the effects whose  
669  $t$ -value was greater than 2, which corresponds to a significance level of 5% in two-tailed tests<sup>72</sup>.

670 Partial effects were computed (for visual representation) from the (G)LMMs' fixed effects  
671 using the *ggpredict* function from the *ggeffects* package (Version 0.8.0) in R (Version R-3.5.3).

672 **Statistical analysis of inter-word-spacing and character-size effects.** Additional analyses  
673 were conducted to estimate MASC's simulated behavior over FSC sentences as a function of  
674 inter-word spacing and print size (see Model simulations), using the same procedure as in the  
675 main analyses. However, since FSC readers were tested only in the normal spacing condition  
676 and for characters subtending  $0.25^\circ$ , data set was not entered as a predictor. MASC's estimated  
677 effects are shown in Supplementary Tables 29-41 and described in Supplementary Methods 3.  
678 They were compared to previously reported effects of inter-word spacing and print size  
679 (Extended Data Fig. 9a-d) as well as data from spaced- and unspaced-language studies using  
680 different font sizes (Extended Data Fig. 8, 9e-g).

#### 681 **Data availability**

682 All stimulus materials and data used in the present study are available through the Zenodo  
683 repository: <https://doi.org/10.5281/zenodo.5338616>.

#### 684 **Code availability**

685 The model code and the R-scripts that were used for data analysis and figure generation are  
686 available through the Zenodo repository: <https://doi.org/10.5281/zenodo.5338616>.

#### 687 **References**

- 688 52. Geisler, W.S. & Perry, J.S. in *Eye Tracking Research & Applications Symposium* (ed.  
689 Duchowski, A. T.) 83–87 (New York: Association for Computing Machinery, 2002).
- 690 53. Harel, J., Koch, C. & Perona, P. in *Adv. Neural Inf. Process. Syst.* 19 (eds. Schölkopf, B.,  
691 Platt, J. & Hofman, T.) 545–552 (NIPS, 2006).
- 692 54. Goldberg, M.E. & Wurtz, R.H. Activity of superior colliculus in behaving monkey: I.  
693 Visual receptive fields of single neurons. *J. Neurophysiol.* **35**, 542–559 (1972).

- 694 55. Cynader, M., & Berman, N. Receptive-field organization of monkey superior colliculus. *J.*  
695 *Neurophysiol.* **35**, 187–201 (1972).
- 696 56. Sparks, D.L. & Hartwich-Young, R. The deep layers of the superior colliculus. *Rev.*  
697 *Oculomot. Res.* **3**, 213–255 (1989).
- 698 57. Lee, C., Rohrer, W.H. & Sparks, D.L. Population coding of saccadic eye movements by  
699 neurons in the superior colliculus. *Nature* **332**, 357–360 (1988).
- 700 58. Anderson, R.W., Keller, E.L., Gandhi, N.J. & Das, S. Two-dimensional saccade-related  
701 population activity in superior colliculus in monkey. *J. Neurophysiol.* **80**, 798–817 (1998).
- 702 59. McIlwain, J.T. Visual receptive fields and their images in superior colliculus of the cat. *J.*  
703 *Neurophysiol.* **38**, 219–230 (1975).
- 704 60. Munoz, D.P. & Wurtz, R.H. Saccade-related activity in monkey superior colliculus: II.  
705 Spread of activity during saccades. *J. Neurophysiol.* **73**, 2334–2348 (1995).
- 706 61. van Opstal, A.J., van Gisbergen, J.A. & Smith, A.C. Comparison of saccades evoked by  
707 visual stimulation and collicular electrical stimulation in the alert monkey. *Exp. Brain Res.*  
708 **79**, 299–312 (1990).
- 709 62. Schiller, P.H. & Stryker, M. Single-unit recording and stimulation in superior colliculus of  
710 the alert rhesus monkey. *J. Neurophysiol.* **35**, 915–924 (1972).
- 711 63. Robinson, D.A. Eye movements evoked by collicular stimulation in the alert monkey.  
712 *Vision Res.* **12**, 1795–1808 (1972).
- 713 64. Sparks, D.L., Holland, R. & Guthrie, B.L. Size and distribution of movement fields in the  
714 monkey superior colliculus. *Brain Res.* **113**, 21–34 (1976).
- 715 65. van Opstal, A.J. & van Gisbergen, J.A. Scatter in the metrics of saccades and properties of  
716 the collicular motor map. *Vision Res.* **29**, 1183–1196 (1989).
- 717 66. Marino, R.A., Rodgers, C.K., Levy, R. & Munoz, D.P. Spatial relationships of visuomotor  
718 transformations in the superior colliculus. *J Neurophysiol* **100**, 2564–2576 (2008).

- 719 67. Yang, S.-N. An oculomotor-based model of eye movements in reading: The competition-  
720 interaction model. *Cogn. Syst. Res.* **7**, 56-69 (2006).
- 721 68. Fraley, C., Raftery, A.E., Murphy, T.B. & Scrucca, L. mclust Version 4 for R: Normal  
722 Mixture Modeling for Model-Based Clustering, Classification, and Density Estimation.  
723 *Technical Report No. 597* (Department of Statistics, University of Washington, 2012).
- 724 69. R Development Core Team. *R: A Language and Environment for Statistical Computing*.  
725 (R Foundation for Statistical Computing, Vienna, Austria, 2008).
- 726 70. Fraley, C. & Raftery, A.E. Bayesian regularization for normal mixture estimation and  
727 model-based clustering. *J. Classif* **24**, 155-181 (2007).
- 728 71. Kaas, R.E. & Raftery, A.E. Bayes Factors. *J. Am. Stat. Assoc.* **90(430)**, 773-795 (1995).
- 729 72. Bates, D., Mächler, M., Bolker, B. & Walker, S. Fitting Linear Mixed-Effects Models  
730 Using lme4. *J. Stat. Softw.* **67(1)**, 1–48 (2015).
- 731 73. Baayen, R.H. *Analyzing Linguistic Data: A Practical Introduction to Statistics using*  
732 *R*. (Cambridge University Press, Cambridge, 2008).

### 733 **Acknowledgments**

734 F.V.: The behavioral component of this work was carried out within the Labex BLRI (ANR-  
735 11-LABX-0036) and the Institut Convergence ILCB (ANR-16-CONV-0002), which benefited  
736 from support from the French government, managed by the French National Agency for  
737 Research (ANR) and the Excellence Initiative of Aix-Marseille University (A\*MIDEX).  
738 <http://www.agence-nationale-recherche.fr/>. It also received support from the French  
739 government under the Programme “Investissements d’Avenir”, Initiative d’Excellence d’Aix-  
740 Marseille Université via A\*Midex funding (AMX-19-IET-004), and ANR (ANR-17-EURE-  
741 0029). FV would like to thank Eric Castet for his statistical advice. G.J.Z.: The computational  
742 component of this work benefitted from support from the National Science Foundation (Awards



743 1718014, 1734260, and 1763981) and the National Institutes of Health (Award  
744 R21HD093912).

745 **Author contributions**

746 F.V. and G.J.Z. conceptualized the project in 2012; F.V., H.A. and G.J.Z. designed the research;  
747 H.A. and G.J.Z. implemented the model and ran the simulations; F.V. analyzed the simulation  
748 and subject data and did the literature review; F.V., H.A. and G.J.Z. wrote the paper.

749

750 **Extended Data Table 1 | Models of eye-movement control during the reading of spaced and unspaced languages**  
751

| Model Name<br>(Publication Year(s))                                                 | Type<br>/<br>Input | Eye-Movement Guidance Principles                                                                                                                                                                                                              |                                                                                                                         | Selected target                                                                                                                          | ERR        |
|-------------------------------------------------------------------------------------|--------------------|-----------------------------------------------------------------------------------------------------------------------------------------------------------------------------------------------------------------------------------------------|-------------------------------------------------------------------------------------------------------------------------|------------------------------------------------------------------------------------------------------------------------------------------|------------|
|                                                                                     |                    | Inter-Word                                                                                                                                                                                                                                    | Intra-Word                                                                                                              |                                                                                                                                          |            |
| <b>Perceptual Span</b> <sup>73</sup><br>(1979)                                      | T<br>/ LET         | <b>Letter/Word Processing in Perceptual Span</b> <sup>74,2</sup> * <b>Attentional Focus</b><br>* <b>Global Peripheral Processing</b> ( <i>Word Length</i> )                                                                                   |                                                                                                                         | <b>Outside-Span Text Region</b><br>unless within-span attention shift                                                                    | None       |
| <b>Mr Chips</b> <sup>5,75-76</sup><br>(1997-2002)                                   | IOM<br>/ LET       | <b>Ambiguity on Currently Processed Word (CPW)</b><br>Letter extraction ( <i>fixed-size Visual Span: maximal letter visibility</i> ) * Lexical Inferences                                                                                     |                                                                                                                         | <b>Letter Location in Line</b><br>minimizing CPW uncertainty, given undershoot                                                           | RND        |
| <b>Model of Optimal Oculomotor Strategies</b> <sup>77</sup><br>(2015)               | IOM<br>/ PIX       | <b>Ambiguity on Currently Processed Word (CPW)</b><br>Letter-visibility ( <i>Visual-Span Profile</i> <sup>29</sup> ) * Lexical Inferences                                                                                                     |                                                                                                                         | <b>Letter Location in Line</b><br>minimizing CPW uncertainty                                                                             | RND        |
| <b>READER</b> <sup>78-79</sup><br>(1980-1982)                                       | CPM<br>/ LET       | <b>Default 1-Word saccade</b> * <b>Lexical-Syntactic-Semantic Inferences on Word N+1</b> ( <i>no peripheral preview</i> )                                                                                                                     | /                                                                                                                       | <b>Word N + x<sub>1...2</sub></b><br>x = 2 if Word N+1 = high certainty                                                                  | None       |
| <b>ASM</b> <sup>80</sup><br>(1993)                                                  | CNM<br>/ LET       | <b>Attentional Focus * Word N + x<sub>0...n</sub> Processing</b><br>Letter Visibility ( <i>Acuity * Crowding * Similarity</i> ) * Lexical Processing                                                                                          |                                                                                                                         | <b>Center of Word N + x<sub>0...n</sub></b><br>x > 0 (1...) if Word N(+1...) identified before SP <sub>end</sub>                         | None       |
| <b>E-Z Reader</b> <sup>8,81-84,85-89</sup><br>(1999-2006)                           | CPM<br>/ LET       | <b>Word N+1 Processing</b><br>Letter Visibility ( <i>Acuity</i> ) * Lexical Processing<br>+ <b>Post-lexical Processing</b> <sup>84</sup>                                                                                                      | <b>Default Refixation</b><br><i>Word Length</i> <sup>8</sup> vs. <i>ILP</i> <sup>81</sup><br>* <b>Word N Processing</b> | <b>Center of Word N + x<sub>1...2</sub></b><br>x = 2 if Word N+1 familiarity check before non-labile SP, unless refixation not cancelled | SRE<br>RND |
| <b>EMMA</b> <sup>90</sup><br>(2001)                                                 | CPM<br>/ WD        | <b>Attentional Focus * Word N + x<sub>0...n</sub> Processing</b><br><i>Word Eccentricity * Word Frequency</i>                                                                                                                                 |                                                                                                                         | <b>Center of Word N + x<sub>0...n</sub></b><br>x > 0 (1...) if Word N(+1...) encoded before SP <sub>end</sub>                            | RND        |
| <b>Cortical Model</b> <sup>91</sup><br>(2010)                                       | BM<br>/ LET        | <b>Attention-based (left-to-Right) FEF-Motor Buildup * Attended Word Processing</b><br><i>Word length as an index of word-processing difficulty</i>                                                                                           |                                                                                                                         | <b>Word N + x<sub>0...n</sub></b><br>x > 0 (1...) if Word N(+1...) identified before SB                                                  | None       |
| <b>TDPC</b> <sup>92</sup><br>(1990)                                                 | T                  | <b>Word (in Region of Regard) * Sentence Processing</b><br><i>Word Length * Word Frequency * Grammar</i>                                                                                                                                      |                                                                                                                         | <b>Center of Word N-x to Word N+x</b><br>( <i>Probabilistic</i> )                                                                        | None       |
| <b>SWIFT</b> <sup>4,93-94,95-96</sup><br>(2002-2006)                                | CPM<br>/ LET       | <b>Lexical Saliency in Perceptual Span</b><br>Letter Visibility ( <i>Acuity * Left-Right asymmetry</i> ) * Lexical Processing                                                                                                                 |                                                                                                                         | <b>Center of Most Salient Word</b><br>before non-labile SP                                                                               | SRE<br>RND |
| <b>GLENMORE</b> <sup>9,97</sup><br>(2003-2006)                                      | CNM<br>/ LET       | <b>Early: Visibility Saliency</b> (Letter Visibility: <i>Acuity * Left-Right asymmetry</i> )<br><b>Late: Lexical Saliency</b> (Letter Visibility * Lexical Processing)                                                                        |                                                                                                                         | <b>Early: Center of Most Salient Blob</b><br><b>Late: Center of Most Salient Word</b>                                                    | SRE<br>RND |
| <b>OB1 Reader</b> <sup>98</sup><br>(2018)                                           | CNM<br>/ LET       | <b>Visibility Saliency</b> (Letter activity: <i>Eccentricity * Crowding * Attention in RH</i> )<br>unless <b>Lexical Processing triggers a regression</b>                                                                                     |                                                                                                                         | <b>Center of Most Salient Blob/Word</b>                                                                                                  | SRE<br>RND |
| <b>SERIF</b> <sup>99</sup><br>(2005)                                                | CPM<br>/ LET       | <b>Educated guesses * Global Peripheral Processing</b><br><i>Word Length * Word Eccentricity</i><br>(+ <i>Word N RH Uncertainty</i> )                                                                                                         | <b>(Descriptive)</b><br><i>Word N Length * ILP</i>                                                                      | <b>Center (/Beginning) of Blob N + x<sub>1...3</sub></b><br>( <i>Probabilistic</i> )<br>unless Blob N Refixation                         | SRE<br>RND |
| <b>Strategy-Tactics</b> <sup>7,100-102</sup><br>(1987-1998)                         | T<br>/ LET         | <b>Early: Visuo-Motor Strategy * Global Peripheral Processing</b> ( <i>"Fixate longest word"</i> )<br><b>Late: Word N+1 Processing</b>                                                                                                        | <b>Educated Visuo-Motor Tactics</b><br><i>ILP</i>                                                                       | <b>Early: Center of Next (Long) Blob</b><br><b>Late: Center of Word N + x<sub>1...2</sub></b><br>unless Blob N Refixation                | CoG        |
| <b>CoG</b> <sup>40,103-104</sup><br>(1991-2011)                                     | T<br>/ LET         | <b>Early: Fixation Activity (FA) + Spatial Integration Mechanisms in SC</b><br><b>Late: Word N+1 Processing</b>                                                                                                                               |                                                                                                                         | <b>Early: Most active location in SC map</b><br><b>Late: Larger Saccade</b>                                                              | None       |
| <b>Competition-Interaction</b> <sup>24,66,105</sup><br>(2001-2006)                  | BM<br>/ LET        | <b>Early: Strategy-based SC-Population Activity</b> (Rightward oculomotor bias)<br><b>Late: Letter-based SC-Population activity</b> ( <i>Word Length * Word Eccentricity</i> )<br><b>Much Later: Linguistic-Processing related Inhibition</b> |                                                                                                                         | <b>Early: None (CSL)</b><br><b>Late: Center of Word N+x</b><br><b>Much Later: Word N-x</b>                                               | RND        |
| <b>Multilevel Model of Reading Eye-Movement Control</b> <sup>106</sup> (1984)       | T<br>/ LET         | <b>Oculomotor Processes</b><br>* <b>Global Peripheral Processing</b> ( <i>Word Length</i> )<br>* <b>Lexical Processing * Word-Buffer Content * Comprehension Processes</b>                                                                    |                                                                                                                         | <b>None (~CSL)</b><br><b>Center of a selected Blob</b><br><b>Center of a selected Blob/Word</b>                                          | None       |
| <b>Cognitive &amp; Peripheral Search Guidance</b> <sup>107-110</sup><br>(1970-1976) | T<br>/ LET         | <b>Syntactic-Semantic Anticipations * Global Peripheral Processing</b> ( <i>Word Length</i> )<br>vs. <b>Automatic (skilled) Mode * Attentional Verbal Buffer</b>                                                                              |                                                                                                                         | <b>Most informative Letter Location in Line</b><br>vs. <b>None (RND Forward Saccade)</b>                                                 | None       |
| <b>Internal Control</b> <sup>111-112</sup><br>(1974-1976)                           | T<br>/ LET         | <b>Saccade Preprogramming * Availability of Peripheral Input</b><br>* <b>Word-Buffer Content</b>                                                                                                                                              |                                                                                                                         | <b>None (~CSL vs. RG)</b>                                                                                                                | RND        |
| <b>Preprogramming</b> <sup>44,113-116</sup><br>(1908-1937)                          | T                  | <b>Saccade Preprogramming * Global Adjustments</b><br>* <b>Local modulations by peripheral input</b> <sup>113-116</sup>                                                                                                                       |                                                                                                                         | <b>None (~CSL vs. RG)</b>                                                                                                                | RND        |
| <b>DSA</b> <sup>46,117-118</sup><br>(2016)                                          | MM<br>/ LET        | <b>Character/Word Processing in Perceptual Span</b><br>Fixation Duration (peripheral preview) * Frequency/Visibility of Words N & N+1                                                                                                         |                                                                                                                         | <b>Character Location in Line</b><br>maximizing efficiency of foveal & parafoveal processing                                             | RND        |
| <b>Flexible Saccade Target</b> <sup>45</sup><br>(2010)                              | T<br>/ WD          | <b>Word segmentation Success (Yes vs. No)</b><br><i>Visual, morphological, semantic properties of Word N+1</i>                                                                                                                                |                                                                                                                         | <b>Center vs. Beginning of Word N+1</b>                                                                                                  | RND        |
| <b>Extended E-Z Reader</b> <sup>119</sup><br>(2007)                                 | CPM<br>/ LET       | <b>Word N+1 Processing</b><br>Letter Visibility ( <i>Acuity</i> ) * Lexical Processing<br><b>Assuming easy word segmentation</b> ( <i>undefined</i> )                                                                                         | <b>Default Refixation</b><br><i>Word Difficulty</i><br>* <b>Word N Processing</b>                                       | <b>Center of Word N + x<sub>1...2</sub></b><br>x = 2 if Word N+1 familiarity check before non-labile SP, unless refixation not cancelled | SRE<br>RND |

752

753 Column 1: ASM: Attention Shift Model; EMMA: Eye Movements and Movement of Attention; TDPC: Text-  
754 Dependent Probabilistic Control; SWIFT: Saccade-generation With Inhibition by Foveal Targets; SERIF:  
755 Stochastic model of Eye-movements in Reading Incorporating Foveal splitting; CoG: Center of Gravity. Column  
756 2: T: Theory; IOM: Ideal-Observer Model; CPM: Computational Model; CNM: Connectionist Model; BM:  
757 Biological Model; MM: Mathematical Model; LET: letters; WD: Words; PIX: Pixels. Columns 3-4: Word N: the  
758 fixated word; Word N+1(x): the next word(s) in the periphery; Word N-1(x): the immediately prior word(s) in the

759 periphery; CPW: Currently Processed Word –the leftmost word not identified yet (not necessarily the fixated  
760 word); FEF: Frontal Eye Field; Early/Late: early/late during a fixation; ILP: Initial Landing Position; RH: Right  
761 Hemisphere; Undershoot: Saccadic undershoot; SP: Saccade Program; SB: Saccadic Burst; wCoG: weighted CoG;  
762 CSL: Constant (Forward) Saccade length; RG: Regression. Column 5: ERR: Oculomotor errors/noise accounting  
763 for variability; RND: Random; SRE: Saccadic Range Error. Rows: Theories/Models for spaced alphabetic and  
764 unspaced ideographic languages (upper and lower panels) are ordered by eye-movement guidance principles,  
765 separately for inter- and intra-word behavior when this applies. The models involving top-down selection of a  
766 saccade-target location (i.e., word, word-object (“blob”), letter or region on the line) are highlighted; in green: top-  
767 down selective guidance is the default; in grey: only one-off and/or late top-down selective guidance.  
768 Visibility/Lexical saliency in SWIFT, GLENMORE, and OB1 Reader refers to the level of letter/word-related  
769 activity determined by letter/word-identification processes and differs from visual saliency<sup>22</sup>. CoG mechanisms  
770 are a source of oculomotor errors in Strategy-Tactics but a core principle in CoG and MASC. Only the latest and/or  
771 most complete version(s) of a model is detailed; the variables involved are in italics. Models accounting for a  
772 single phenomenon (i.e., launch-site effect<sup>35,120</sup> and word-skipping behavior<sup>32,121-122</sup>), as well as non-processing  
773 descriptive reading models<sup>123</sup>, are not reported.  
774

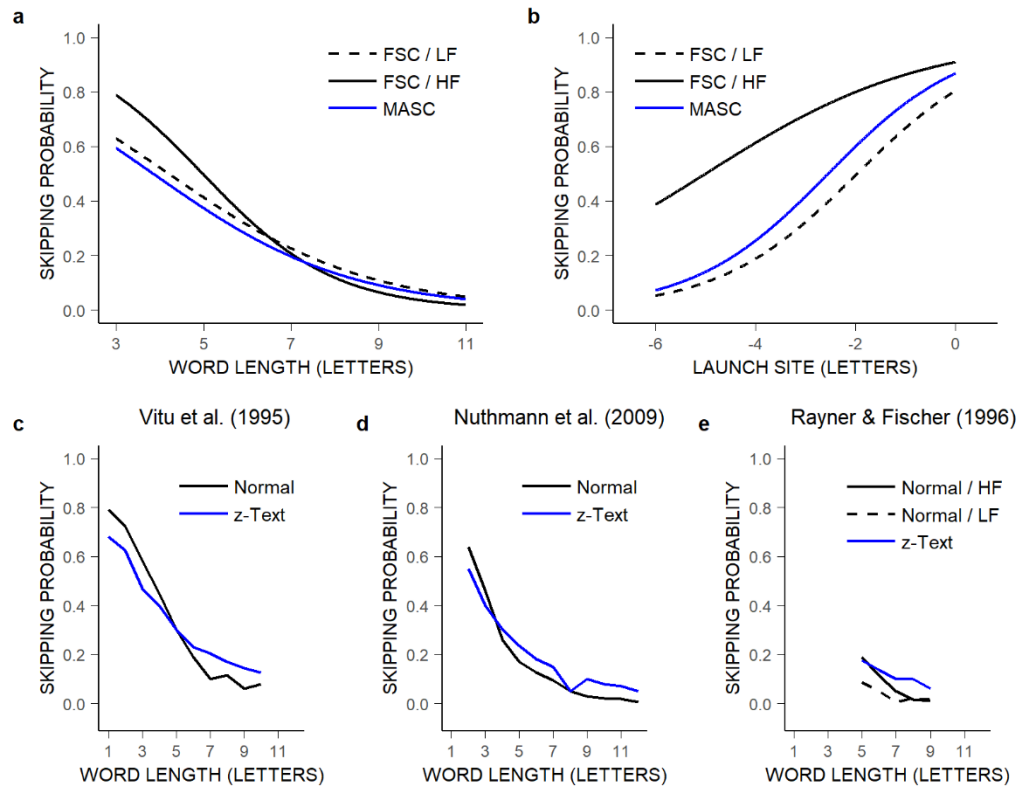

775

776 **Extended Data Figure 1 | Language-related processes only mildly modulate word-skipping behavior. a-b,**  
 777 **Probability of word skipping as a function of word length (a), and for 4-letter words as a function of saccades'**  
 778 **launch-site distance to the space in front of the words (in letters; b), for MASC (blue) across words of different**  
 779 **frequencies and for FSC readers (black) separately for low- and high-frequency (LF and HF) words in French<sup>124</sup>**  
 780 **(dashed and solid lines). Curves for MASC and FSC readers represent partial effects computed from GLMMs**  
 781 **reported respectively in Supplementary Table 5 (Fig. 2b) and in Albregues et al.'s study<sup>31</sup>; in the latter, log word**  
 782 **frequency was entered as an additional continuous predictor, meaning that predictions could be derived for *n* levels**  
 783 **of log word frequency; here, LF and HF corresponded to the minimal and maximal mean log frequency across**  
 784 **word lengths (0.01 and 9.59 log units). MASC nearly behaved as FSC readers encountering LF words. c-e,**  
 785 **Previously reported relationship between word-skipping rate and word length during normal reading (black; by**  
 786 **word frequency in the right panel) and the "reading" of meaningless z-transformed text materials (blue; all letters**  
 787 **replaced by the letter z)<sup>33,94,126,(127)</sup>; the difference between normal- and z-reading conditions is consistent with the**  
 788 **difference observed between FSC readers and MASC (Fig. 2b; a) and between HF and LF words in FSC readers**  
 789 **(a), thus confirming that lexical/linguistic processes only mildly modulate default, mindless, word-skipping**  
 790 **behavior<sup>31-32,125</sup>.**  
 791

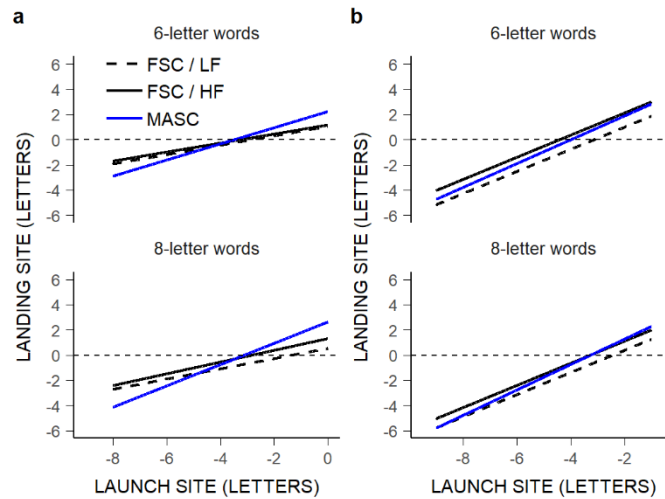

792

793 **Extended Data Figure 2 | Language-related processes only mildly modulate saccades' landing positions. a-**  
794 **b,** Landing positions in 6- and 8-letter words as a function of saccades' launch-site distance to the space in front  
795 of the words, for MASC (blue) across words of different frequencies and for FSC readers (black) separately for  
796 low- and high-frequency (LF and HF) words<sup>124</sup> (dashed and solid lines); **a:** within-word landing positions; **b:** all  
797 saccades' landing positions. The curves for MASC and FSC readers represent the partial effects computed  
798 respectively from two separate LMMs fitted to raw landing positions. In the first, the fixed structure included data  
799 set (2 levels), word length, launch-site distance, and their interaction as predictors (yielding similar estimates as  
800 LMMs fitted to the GMM-estimated mean of landing positions; Fig. 2f-g, Supplementary Tables 10,12), and in  
801 the second (fitted only to FSC data), the fixed structure included word length, launch-site distance, word frequency,  
802 and all interactions as predictors as in Albregues et al.'s study<sup>31</sup>; LF and HF: the lowest and highest word  
803 frequency across words of 6 and 8 letters (-1.97 vs. 6.30 log units respectively). Differences in within-word landing  
804 positions between MASC and FSC readers were greater than differences between HF and LF words in FSC  
805 readers<sup>46,128-134</sup> (**a**), and hence could not entirely be due to MASC lacking a lexicon; rather these differences resulted  
806 from comparing within-word truncated (though more standard) distributions that were not equally spread (see  
807 Supplementary Methods 1). Indeed, when all saccades' landing positions were analyzed, differences between  
808 MASC and FSC readers were smaller, and as tiny as differences between HF and LF words in FSC readers (**b**).  
809 This confirms that lexical processing modulates, but only very mildly, the extent of default forward saccades,  
810 regardless of word boundaries<sup>31,46</sup>.  
811

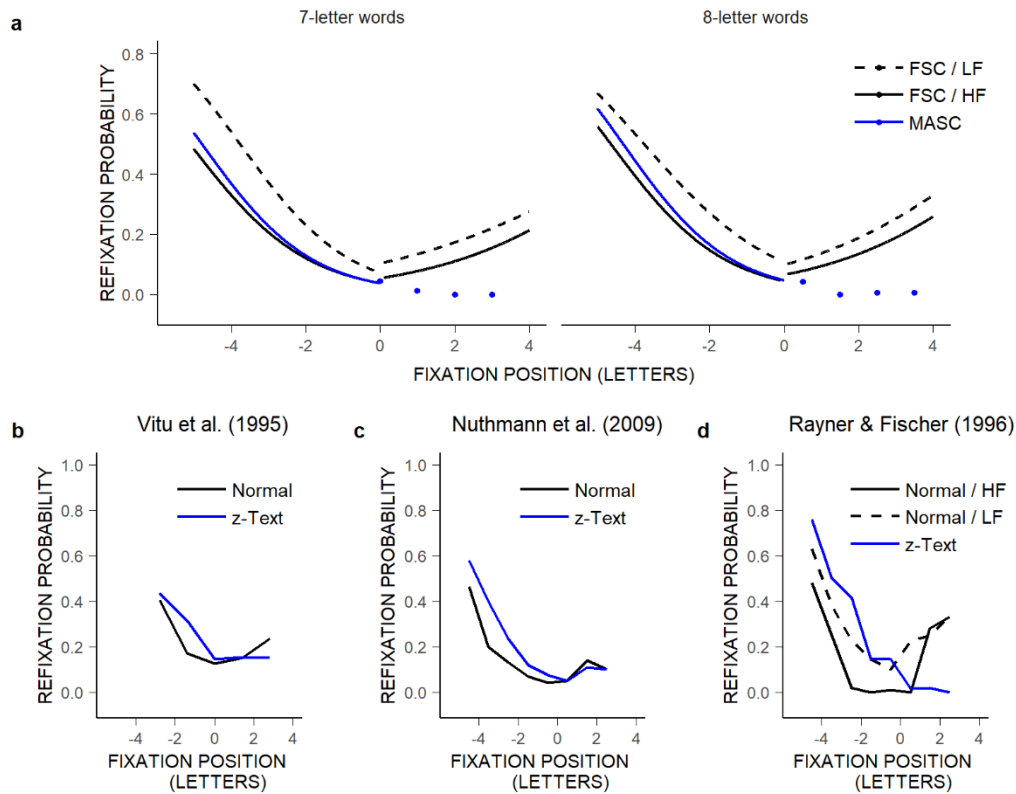

812

813 **Extended Data Figure 3 | Language-related processes only partly contribute to the Refixation-OVP effect.**

814 **a-b**, Probability of within-word refixations as a function of initial fixation location in 7- and 8-letter words, for  
815 MASC (blue) across words of different frequencies and for FSC readers (black) separately for low- and high-  
816 frequency (LF and HF) words<sup>124</sup> (dashed and solid lines). Dots represent means. Curves represent partial effects  
817 computed from GLMMs; the first one, reported in Supplementary Table 13, fitted MASC and FSC data associated  
818 with initial fixations in the first halves of words (Fig. 2h) and enabled representation of MASC's left-OVP effect;  
819 the other two models fitted FSC data separately for initial fixations in the first and second halves of words using  
820 initial fixation position, word length, log word frequency, and all interactions as predictors (the random structure  
821 included a random intercept by subject, sentence pair, and word); LF and HF: -1.97 and 6.30 log units respectively.  
822 MASC, which reproduced only the left wing of U-shaped OVP curves, initiated as few refixations from the words'  
823 centers as readers viewing HF words, but nearly as many refixations from the very-beginnings of words as readers  
824 viewing LF words, thus behaving like readers benefiting not from lexical facilitation (that suppresses unnecessary  
825 refixations from the words' beginnings) and encountering no word-processing difficulties (which cause additional  
826 refixations from the center and likely also the end of words). **b-d**, Previously reported Refixation-OVP effect in  
827 7-letter words during the reading of normal text (black; by word frequency -right panel) and z-transformed text  
828 (blue)<sup>33,94,126</sup>, revealing similarities in eye-movement behavior between z-readers and MASC (**a**), notably a  
829 Refixation-OVP effect with no right wing<sup>137</sup>, and a slightly greater left-OVP effect compared to normal reading.  
830 Thus, language-related processes contribute to, but do not fully explain, the Refixation-OVP effect (see  
831 Supplementary Methods 1).  
832

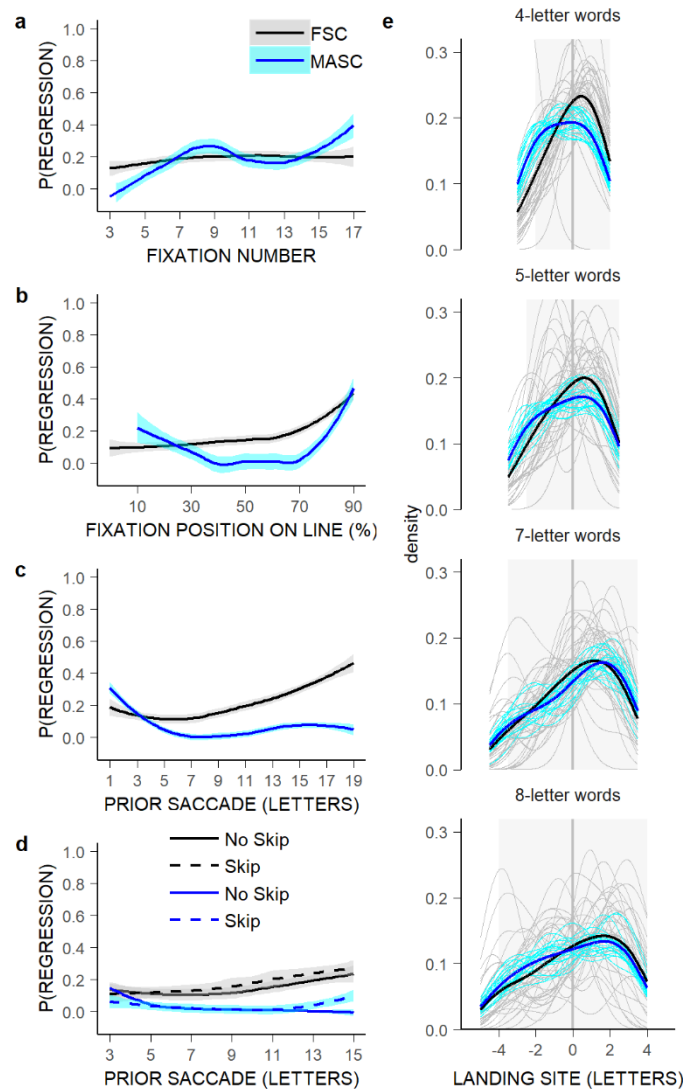

833

834 **Extended Data Figure 4 | Language-related processes more greatly influence the likelihood of regressions,**  
835 **but not their metric. a-d,** Mean probability of a regressive saccade (following a progressive saccade) in MASC  
836 (blue) vs. FSC readers (black) as a function of fixation number in the sentence (a) and fixation position on the line  
837 (in percentage of line length; b), and as a function of the length of the prior saccade (in letters), irrespective of how  
838 many words the saccade traversed (c) and separately for word-skipping and non-word-skipping saccades (dashed  
839 and solid lines; d). All curves were fitted with a loess smoothing function (with 0.95 confidence bands in cyan and  
840 grey). Unlike FSC readers, MASC generated regressive saccades essentially from the end parts of the sentences,  
841 regardless of prior saccade length, failing to replicate the well-established increase in regression rate with  
842 increasing prior saccade length<sup>138-140</sup>, thereby suggesting that regressions mostly result from language-related  
843 processes<sup>141</sup>. e, Probability density functions of the landing positions of regressive saccades, in letters relative to  
844 the centers of 4-,5-,7-, and 8-letter words, across and by subjects (thick and thin lines) for MASC and FSC readers.  
845 Both FSC readers and MASC most frequently landed to the right of the words' centers<sup>140</sup> regardless of their  
846 length<sup>142</sup> (Supplementary Tables 14-15), thus suggesting that visuo-motor principles in the SC determine the  
847 landing positions of regressive saccades. Only the occurrence of regressions would primarily be under top-down  
848 control (see Supplementary Methods 1).  
849

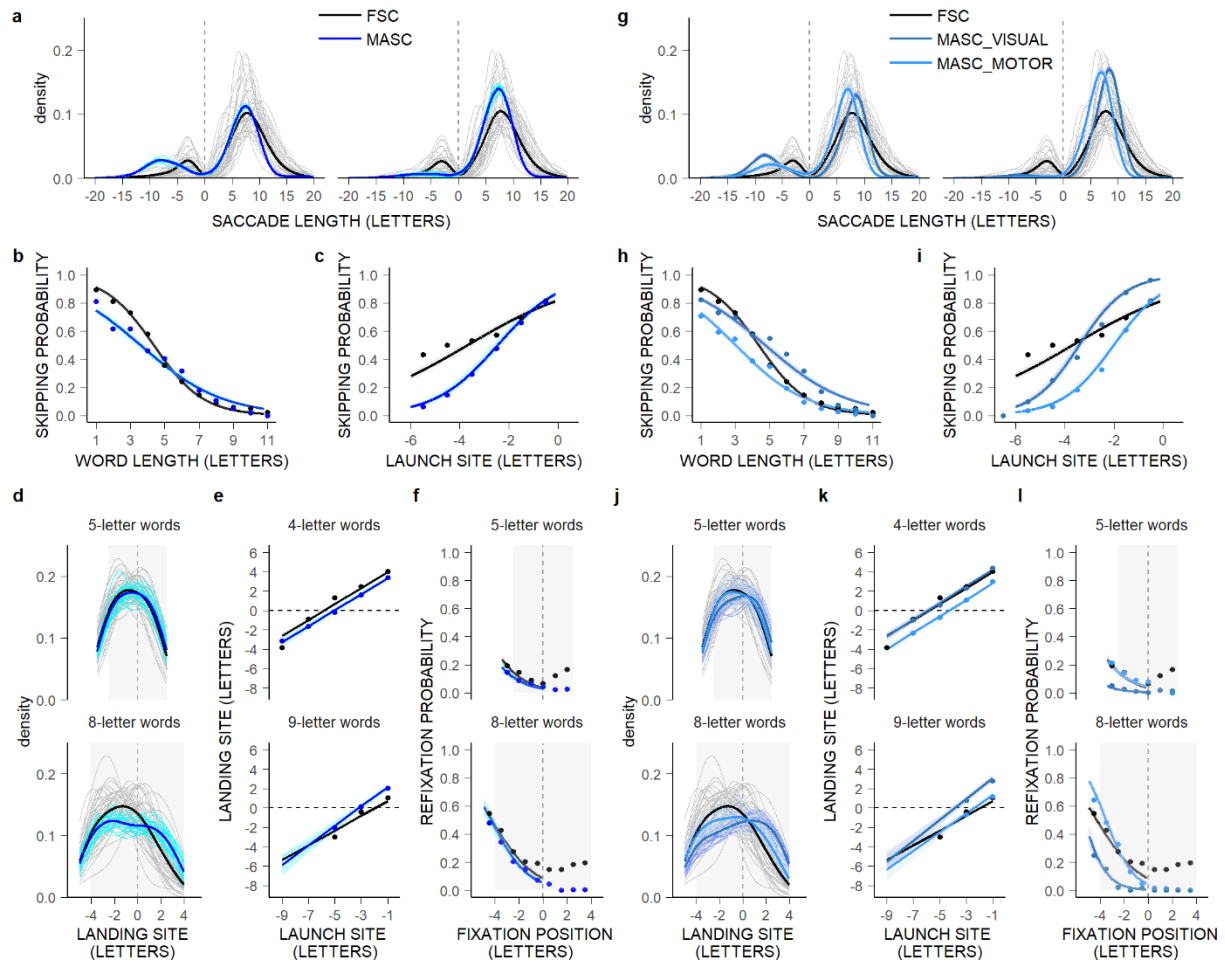

850

851 **Extended Data Figure 5 | Cascaded averaging over both visual- and motor-point images in SC space**  
 852 **accounts best for readers' oculomotor behavior. a-l,** First-pass oculomotor behavior for MASC (blue; a-f), and  
 853 for MASC with averaging over visual- or motor-point images only (MASC\_VISUAL and MASC\_MOTOR;  
 854 dark/light blue; g-l), compared to FSC readers (black) –see Methods, Supplementary Methods 2. a,g, Probability  
 855 density functions of saccade lengths (in letters) across and by subjects (thick and thin lines); left panels: for  
 856 comparison for data sets matched for numbers of fixations. b-c,h-i, Mean probability of word skipping (dots) as  
 857 a function of word length (in letters; b,h), and for 4-letter words as a function of saccades' launch-site distance to  
 858 the space in front of the words (in letters; c,i), and partial effects (lines), with 0.95 confidence intervals (bands),  
 859 computed from GLMMs (Supplementary Tables 20-21). d,j, Probability density functions of within-word landing  
 860 positions (in letters relative to the centers of words; vertical grey lines) across and by subjects for 5- and 8-letter  
 861 words (grey-filled rectangle areas). e,k, GMM-estimated means of all landing positions, in letters relative to the  
 862 centers of 4- and 9-letter words, as a function of launch-site distance, and partial effects, with 0.95 confidence  
 863 intervals, computed from LMMs (Supplementary Tables 26-27). f,l, Mean within-word refixation probability as a  
 864 function of initial fixation location (in letters relative to the centers of words) for 5- and 8-letter words, and partial  
 865 effects, with 0.95 confidence intervals, computed from GLMMs but only for the left wing of OVP curves  
 866 (Supplementary Table 28). MASC's first-pass behavior (a-f) resembled that observed when MASC and FSC were  
 867 matched for numbers of fixations (Fig 2), although regressions were less likely. Averaging over visual- or motor-  
 868 point images sufficed to generate word-based oculomotor behavior (g-l), but it did not beat averaging over both  
 869 visual and motor-point images (a-f).

870



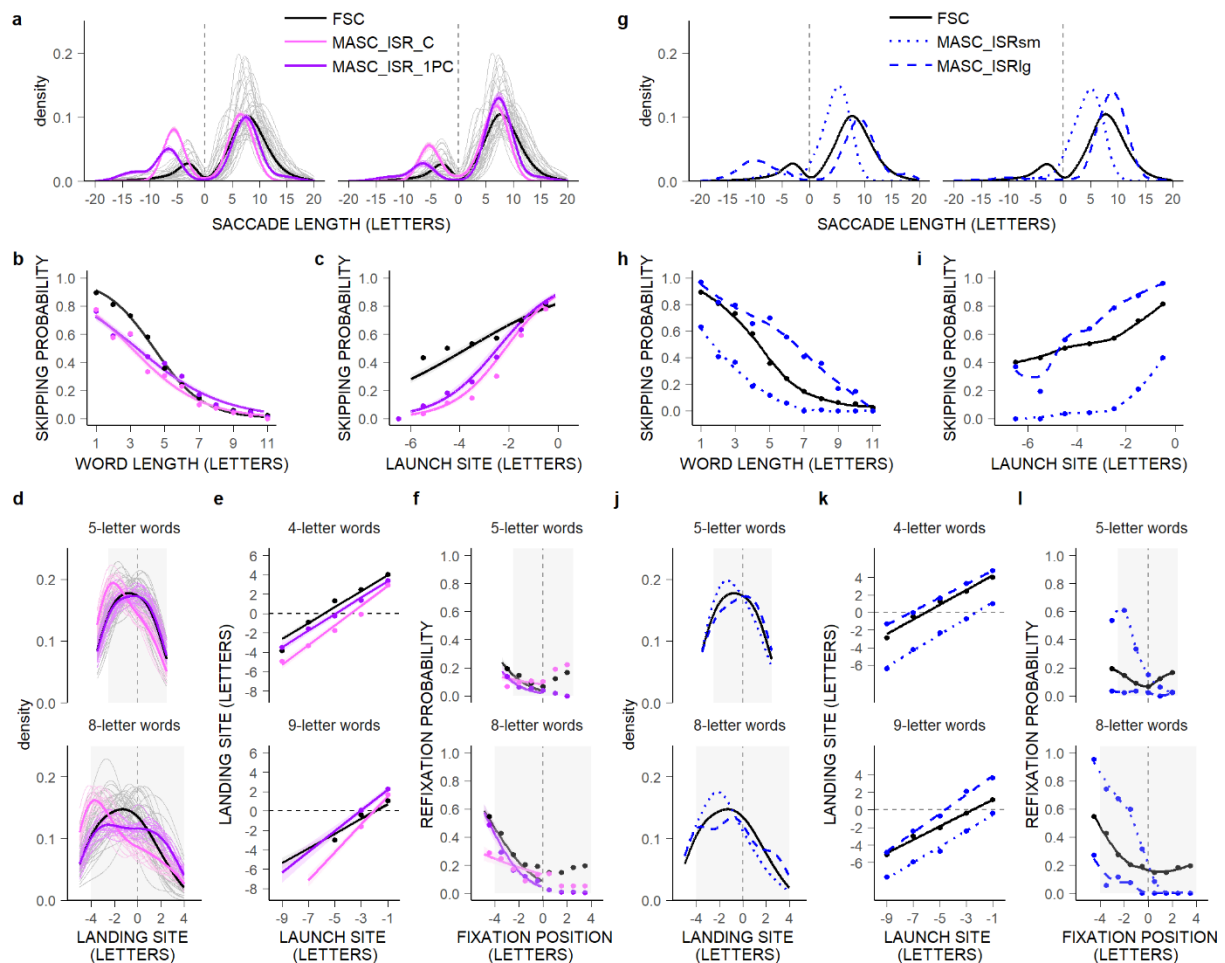

871

872 **Extended Data Figure 6 | There is no need for specific ISR-parameter settings to reproduce readers'**  
 873 **stereotyped oculomotor behavior.** **a-l**, First-pass oculomotor behavior for MASC with ISR applied to the current  
 874 fixation (ISR\_C; pink) or the current and immediately prior fixations (ISR\_1PC; purple; **a-f**; see Supplementary  
 875 Methods 2), and for MASC with the smallest and largest tested ISR-window sizes (dotted/dashed-blue lines; **g-l**)  
 876 during that parameter fit (see Methods), compared to FSC readers (black). **a,g**, Probability density functions of  
 877 saccade lengths across (**a,g**) and by subjects (**a**); left panels: for comparison for data sets matched for numbers of  
 878 fixations. **b-c,h-i**, Mean probability of word skipping (dots) as a function of word length (in letters; **b,h**), and for  
 879 4-letter words as a function of saccades' launch-site distance to the space in front of the words (in letters; **c,i**); in  
 880 **b-c**, partial effects, with 0.95 confidence intervals, computed from GLMMs (Supplementary Tables 20-21); in **h-**  
 881 **i**, Loess-smoothing curves. **d,j**, Probability density functions of within-word landing positions (in letters relative  
 882 to the centers of words) across (**d,j**) and by subjects (**d**) for 5- and 8-letter words. **e,k**, Mean of all landing positions,  
 883 in letters relative to the centers of 4- and 9-letter words, as a function of launch-site distance; in **e**, GMM-estimated  
 884 means and partial effects, with 0.95 confidence intervals, computed from LMMs (Supplementary Tables 26-27);  
 885 in **k**, raw means and Loess-smoothing curves. **f,l**, Mean within-word refixation probability as a function of initial  
 886 fixation location, in letters relative to the centers of 5- and 8-letter words; in **f**, partial effects, with 0.95 confidence  
 887 intervals, computed from GLMMs but only for the left-OVP wing (Supplementary Table 28); in **l**, Loess-  
 888 smoothing curves. Word-based phenomena held across both MASC\_ISR\_C and MASC\_ISR\_1PC (**a-f**), and the  
 889 whole range of ISR-window sizes (**g-l**), although with a slightly poorer fit than for MASC (Extended Data Fig.  
 890 5a-f).

891

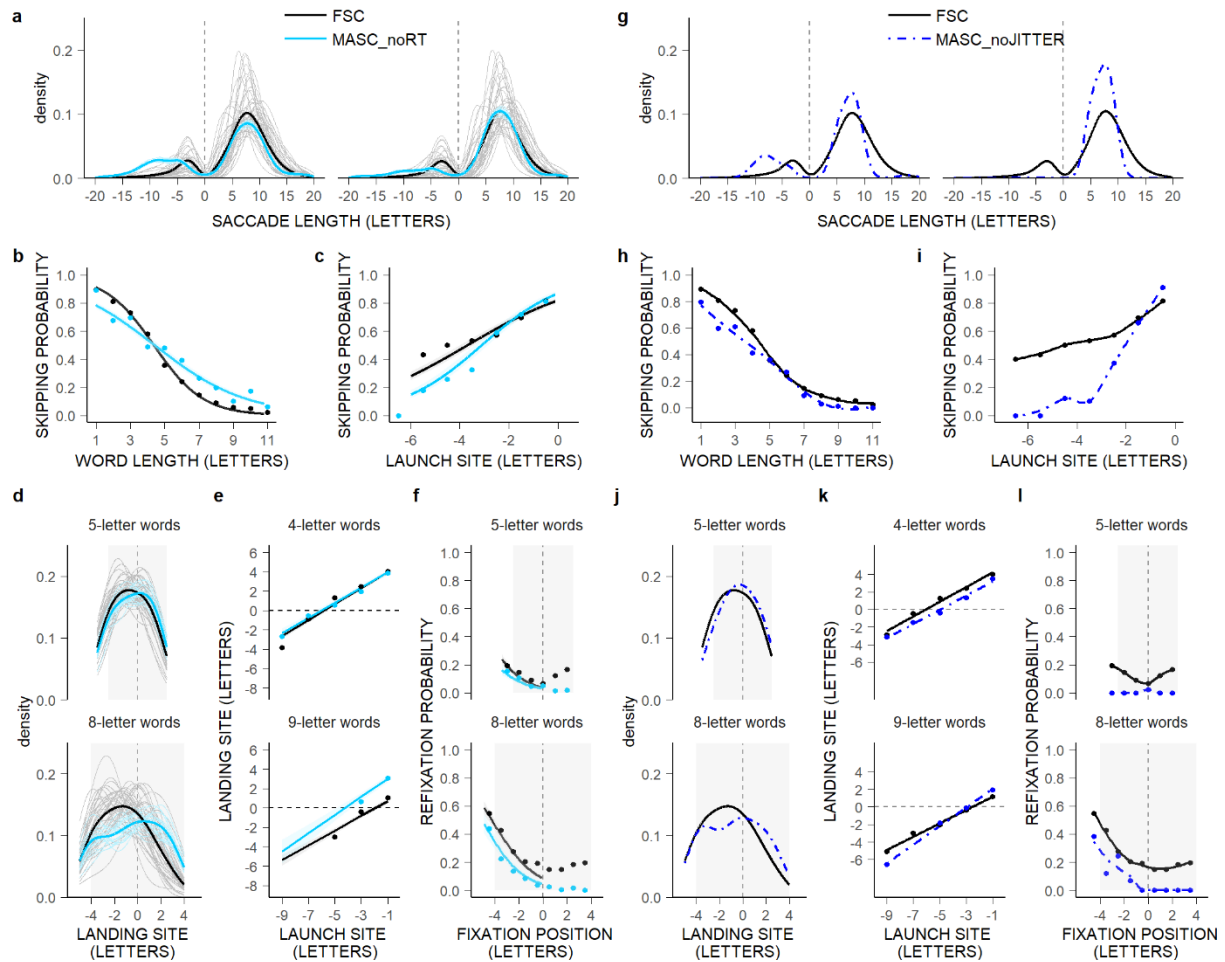

892

893 **Extended Data Figure 7 | RT and population jitter contribute only mildly to readers' stereotyped**  
 894 **oculomotor behavior. a-l**, First-pass oculomotor behavior for MASC with no RT (MASC\_noRT; turquoise; a-f;  
 895 see Supplementary Methods 2), and for MASC amputated from jitter over the winning population  
 896 (MASC\_noJITTER; dashed-blue lines; g-l) compared to FSC readers. See Extended Data Fig. 6 legend. Overall,  
 897 MASC\_noRT (a-f) and MASC\_noJITTER (g-l) made very similar predictions to MASC (Extended Data Fig. 5a-  
 898 f).  
 899

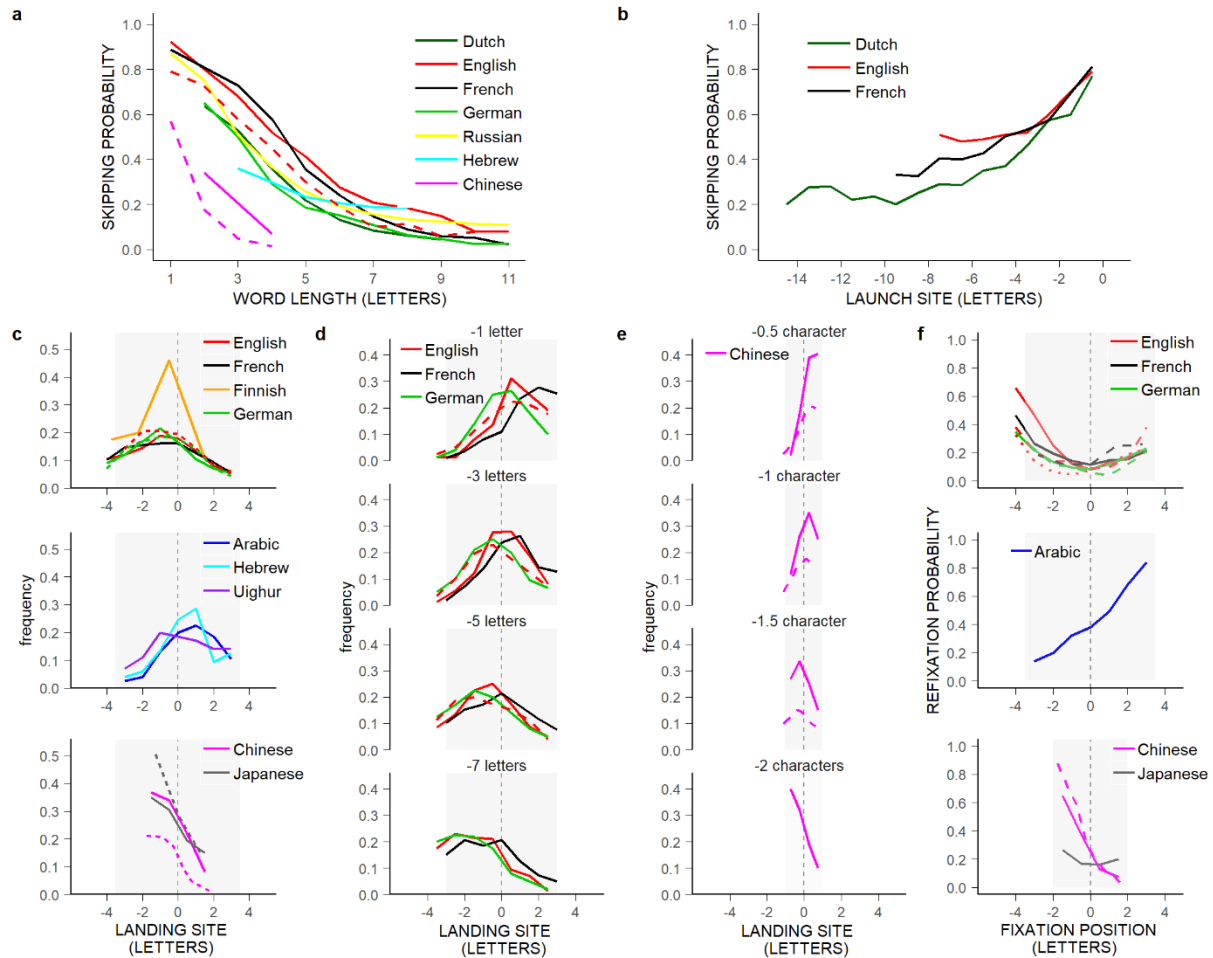

900

901 **Extended Data Figure 8 | Word-based eye-movement phenomena across studies and languages.** **a,**  
 902 Relationship between the probability of word skipping and word length (in letters/characters) in different studies  
 903 (line types) and languages (colors), including spaced-alphabetic languages read from left to right (Dutch<sup>32</sup>,  
 904 English<sup>33,42</sup>, French/FSC<sup>31</sup>, German<sup>4</sup>, Russian<sup>143</sup>) and from right to left (Hebrew<sup>144</sup>), as well as left-to-right  
 905 unspaced-ideographic languages (Chinese<sup>45,118</sup>). **b,** Relationship between the probability of word skipping and  
 906 saccades' launch-site distance to the space in front of the words for 4-letter words (in letters/characters) in  
 907 alphabetic languages (Dutch<sup>32</sup>, English<sup>121</sup>, French/FSC<sup>31</sup>). **c,** Frequency distributions of within-word landing  
 908 positions (in letters/characters relative to the centers of words) representing the PVL effect separately for 7-letter  
 909 words in spaced-alphabetic languages read from left to right (English<sup>35,43</sup>, French/FSC<sup>31</sup>, Finnish<sup>145</sup>, German<sup>146-</sup>  
 910 <sup>147</sup>) and from right to left (Arabic<sup>148</sup>, Hebrew<sup>144</sup>, Uighur<sup>132</sup>) and 4-character words in left-to-right unspaced-  
 911 ideographic languages (Chinese<sup>45,118</sup> and Japanese<sup>149-150</sup>); data for other word lengths showed similar pattern (but  
 912 see<sup>128</sup> for Chinese). **d-e,** Frequency distributions of within-word landing positions (in letters/characters relative to  
 913 the centers of words) for different launch-site distances (-1,-3,-5,-7 letters) separately for 6-letter words in  
 914 English<sup>35,151</sup>, French/FSC<sup>31</sup>, and German<sup>147</sup> (**d**) and 2-character words in Chinese<sup>45,128</sup> (**e**). **f,** Within-word refixation  
 915 probability as a function of initial fixation location (in letters/characters relative to the centers of words) separately  
 916 for 7-letter words in left-to right and right-to-left spaced-alphabetic languages (English<sup>135,151-152</sup>, French/FSC<sup>31,153</sup>,  
 917 German<sup>146-147</sup>, and Arabic<sup>148</sup>) and 4-character words in left-to-right unspaced-ideographic languages (Chinese<sup>45,118</sup>,  
 918 Japanese<sup>149</sup>). Color code: Arabic: blue; Chinese: pink; Dutch: dark green; English: red; Finnish: orange; French:  
 919 black; German: green; Japanese: grey; Uighur: purple; Russian: yellow. All word-based eye-movement patterns  
 920 are very similar across studies and languages; differences in word-skipping behavior, PVL, and OVP effects,  
 921 notably between spaced and unspaced languages, are attributable to print-size differences (Extended Data Fig. 9,  
 922 Supplementary Methods 3).

923

924

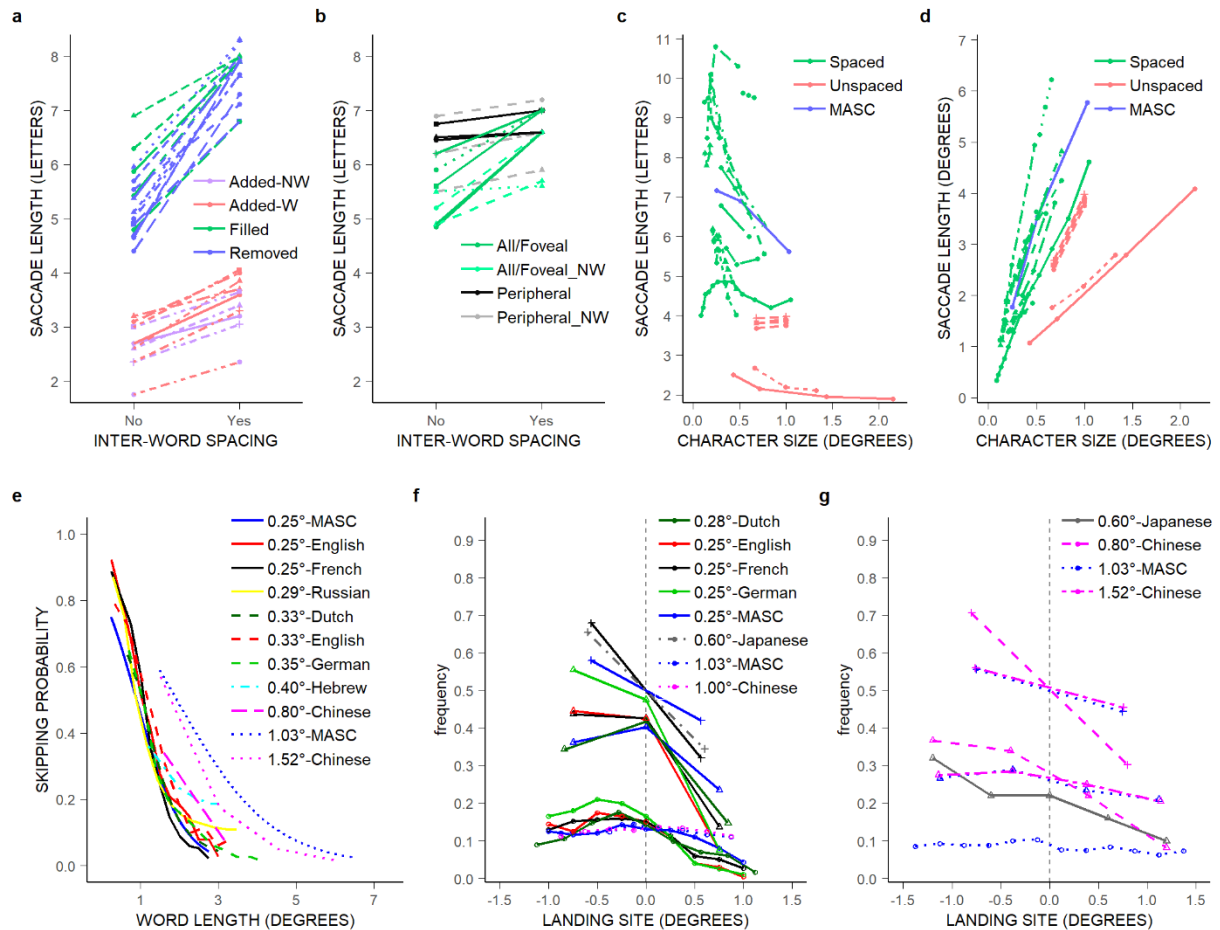

925  
 926 **Extended Data Figure 9 | Character-print size, but not inter-word spacing, accounts for differences between**  
 927 **spaced and unspaced languages.** **a-b**, Mean forward-saccade length (in letters/characters) as a function of inter-  
 928 word spacing in different studies (line types), separately for global spacing manipulations (**a**: space removal<sup>154-160</sup>  
 929 (blue) or space filling<sup>155,158,160-161</sup> (green) in normally spaced English/French/Spanish texts/sentences and space  
 930 addition between words<sup>150,162-163</sup> (“-W”; pink) or non-words<sup>162-163</sup> (“-NW”; purple) in normally unspaced  
 931 Chinese/Japanese texts/sentences) and gaze-contingent space-filling manipulations (**b**: in the fovea and possibly  
 932 also in the (right) periphery<sup>24,164,165</sup> (green), or exclusively in the (right) periphery, thus preserving the space(s)  
 933 around the fixated word<sup>164-166</sup> (black/grey); letters in the filled-text region were preserved or replaced by  
 934 x’s/random letters (“-NW”) –for even tinier spacing effects on within-word landing-positions see<sup>150,156-161,163,167-</sup>  
 935 <sup>168,(133,169),but 150,154,167,(170)</sup>. **c-d**, Mean forward-saccade length in letters (**c**) and in degrees (**d**) as a function of angular  
 936 print size for spaced-alphabetic languages (English<sup>171-174</sup>, French<sup>26,175-177</sup>, German<sup>178</sup>, Slovene<sup>179</sup>; green) and  
 937 Chinese (pink)<sup>25,178,180</sup>, and for MASC (blue) viewing FSC sentences in three print sizes. Paterson and Tinker<sup>174</sup>:  
 938 we assumed a 50-cm viewing distance; Kolers et al.<sup>172</sup>: we divided the reported number of fixations by line length.  
 939 **e**, Probability of word skipping in different studies/languages (Extended Data Fig 8a; same color code) using  
 940 various print sizes (line types), and for MASC in two print-size conditions (Fig. 4h, Supplementary Table 37), re-  
 941 plotted as a function of word length in degrees<sup>181-182</sup>. **f-g**, Frequency distributions of within-word landing positions  
 942 (in degrees relative to the words’ centers) in different studies/languages (**f**: Dutch<sup>183</sup>, English<sup>43</sup>, French/FSC<sup>31</sup>,  
 943 German<sup>147</sup>, Chinese<sup>128</sup>, Japanese<sup>149</sup>; **g**: Chinese<sup>45,118</sup>, Japanese<sup>149</sup>; same color code as in Extended Data Fig 8c)  
 944 using different print sizes (**f**: 0.25°, 0.28°, 0.6°, 1°; **g**: 0.6°, 0.8°, 1.03°, 1.52°; solid to dotted lines), and for MASC  
 945 in two print-size conditions (**f**: 1°, 0.25°; **g**: 1°), separately for two angular word sizes (**f**: 2-2.52°; **g**: 3-3.2°) and  
 946 three bin sizes (**f**: 0.25°, 0.75-0.84°, 1.125-1.2°; **g**: 0.25°, 0.6-0.8°, 1.5°; circle, triangle and cross) whenever  
 947 possible given reported data. All findings are described in Supplementary Methods 3.  
 948

949 **References**

- 950 74. McConkie, G.W. in *Processing of visible language* **Vol. 1** (eds. Kolars, P.A., Wrolstad,  
951 M.E. & Bouma, H.) 37-48 (Plenum, New York, 1979).
- 952 75. McConkie, G.W. & Rayner, K. The span of the effective stimulus during a fixation in  
953 reading. *Percept. Psychophys.* **17**, 578-586 (1975).
- 954 76. Legge, G.E., Klitz, T.S. & Tjan, B.S. Mr. Chips: An ideal-observer model of reading.  
955 *Psychol. Rev.* **104**, 524-553 (1997).
- 956 77. Klitz, T.S., Legge, G.E. & Tjan, B.S. in *Reading as a perceptual process* (eds. Kennedy,  
957 A., Radach, R., Heller, D. & Pynte, J.) 667-682 (Elsevier, Oxford, 2000).
- 958 78. Bernard, J.-B., Moscoso Del Prado, F. & Castet, E. Predicting oculomotor strategies in  
959 reading with normal and damaged visual fields. *Perception* **44(S1)**, 70 (2015).
- 960 79. Thibadeau, R., Just, M.A. & Carpenter, P.A. A model of the time course and content of  
961 reading. *Cogn. Sci.* **6**, 157–203 (1982).
- 962 80. Just, M.A. & Carpenter, P.A. A theory of reading: From eye fixations to Comprehension.  
963 *Psychol. Rev.* **87**, 329-354 (1980).
- 964 81. Reilly, R. in *Perception and cognition: Advances in eye movement research* (ed.  
965 d'Ydewalle, G. & Van Rensbergen, J.) 191-212 (North Holland, Amsterdam, New York,  
966 1993).
- 967 82. Pollatsek, A., Reichle, E.D. & Rayner, K. Tests of the E-Z Reader model: Exploring the  
968 interface between cognition and eye-movement control. *Cogn. Psychol.* **52**, 1-56 (2006).
- 969 83. Reichle, E. D., Pollatsek, A. & Rayner, K. E-Z Reader: A cognitive-control, serial-attention  
970 model of eye-movement behavior during reading. *Cogn. Syst. Res.* **7**, 4-22 (2006).
- 971 84. Reichle, E.D., Pollatsek, A. & Rayner, K. Using E-Z Reader to simulate eye movements  
972 in non-reading tasks: A unified framework for understanding the eye-mind link. *Psychol.*  
973 *Rev.* **119(1)**, 155-185 (2012).

- 974 85. Reichle, E.D., Warren, T. & McConnell, K. Using E-Z Reader to model the effect of  
975 higher-level language processing on eye movements during reading. *Psychon. Bull. Rev.*  
976 **16(1)**, 1-21 (2009).
- 977 86. Morrison, R.E. Manipulation of stimulus onset delay in reading: Evidence for parallel  
978 programming of saccades. *J. Exp. Psychol. Hum. Percept. Perform.* **10**, 667-682 (1984).
- 979 87. Pollatsek, A. & Rayner, K. in *Comprehension processes in reading* (eds. Balota, D.A.,  
980 Flores d'Arcais, G.B. & Rayner, K.) 143-163 (Erlbaum, Hillsdale, NJ, 1990).
- 981 88. Rayner, K., & Pollatsek, S. *The Psychology of Reading*. (Prentice-Hall, London, 1989).
- 982 89. Reichle, E.D., Pollatsek, A., Fisher, D.L. & Rayner, K. Toward a model of eye movement  
983 control in reading. *Psychol. Rev.* **105(1)**, 125-157 (1998).
- 984 90. Reichle, E.D., Rayner, K. & Pollatsek, A. Eye-movement control in reading: accounting  
985 for initial fixation locations and refixations within the E-Z reader model. *Vision Res.* **39**,  
986 4403-4411 (1999).
- 987 91. Salvucci, D.D. An integrated model of eye movements and visual encoding. *Cogn. Syst.*  
988 *Res.* **1**, 201-220 (2001).
- 989 92. Heinzle, J., Hepp, K. & Martin, A.C. A biologically realistic cortical model of eye  
990 movement control in reading. *Psychol. Rev.* **117(3)**, 808-830 (2010).
- 991 93. Suppes, P. in *Eye movements and their role in visual and cognitive processes* (ed. Kowler,  
992 E.) 455-477 (Elsevier, Amsterdam, 1990).
- 993 94. Richter, E.M., Engbert, R. & Kliegl, R. Current advances in swift. *Cogn. Syst. Res.* **7**, 25-  
994 33 (2006).
- 995 95. Nuthmann, A. & Engbert, R. Mindless reading revisited: An analysis based on the SWIFT  
996 model of eye-movement control. *Vision Res.* **49**, 322-336 (2009).
- 997 96. Engbert, R. & Kliegl, R. Mathematical models of eye movements in reading: a possible  
998 role for autonomous saccades. *Biol. Cybern.* **85**, 77-87 (2001).

- 999 97. Engbert, R., Longtin, A. & Kliegl, R. A dynamical model of saccade generation in reading  
1000 based on spatially distributed lexical processing. *Vision Res.* **42**, 621-636 (2002).
- 1001 98. Reilly, R. & Radach, R. in *Cognitive and applied aspects of eye movement research* (eds.  
1002 Hyönä, J., Radach, R. & Deubel, H.) 429-455 (Elsevier, Amsterdam, 2003).
- 1003 99. Snell, J., van Leipsig, S., Grainger, J. & Meeter, M. OB1-Reader: A model of word  
1004 recognition and eye movements in text reading. *Psychol. Rev.* **125(6)**, 969-984 (2005).
- 1005 100. McDonald, S.A., Carpenter, R.H.S. & Shillcock, R.C. An anatomically constrained,  
1006 stochastic model of eye movement control in reading. *Psychol. Rev.* **112**, 814-840 (2005).
- 1007 101. O'Regan, J.K. in *Eye movements and visual cognition: Scene perception and reading* (ed.  
1008 Rayner, K.) 333-354 (Springer-Verlag, New York, 1992).
- 1009 102. Reilly, R.G. & O'Regan, J.K. Eye movement control during reading: A simulation of some  
1010 word targeting strategies. *Vision Res.* **38(2)**, 303-317 (1998).
- 1011 103. O'Regan, J.K. & Lévy-Schoen, A. in *Attention and performance XII: The psychology of*  
1012 *reading* (ed. Coltheart, M.) 363-383 (Erlbaum, Hillsdale, NJ, 1987).
- 1013 104. Vitu, F. The basic assumptions of E-Z reader are not well-founded. *Behav. Brain Sci.* **26(4)**,  
1014 506-507 (2003).
- 1015 105. Vitu, F. in *Handbook on Eye Movements* (eds. Liversedge, S.P., Gilchrist, I.D. & Everling,  
1016 S.) 731-750 (Oxford University Press, 2011).
- 1017 106. Yang, S.-N., & McConkie, G.W. Eye movements during reading: A theory of saccade  
1018 initiation times. *Vision Res.* **41**, 3567-3585 (2001).
- 1019 107. Shebilske, W. in *Cognition and motor processes* (eds. Prinz, W. & Sanders, A. F.) 99-119  
1020 (Springer-Verlag, Berlin, Heidelberg, 1984).
- 1021 108. Hochberg, J. in *Basic studies on reading* (eds. Levin, H. & Williams, J.P.) (Basic Books,  
1022 New York, 1970).
- 1023 109. Hochberg, J. On the control of saccades in reading. *Vision Res.* **15** (1975).

- 1024 110.Hochberg, J. in *Eye movements and psychological processes* (eds. Monty, R.A. & Senders,  
1025 J.W.) 397-417 (Erlbaum, Hillsdale, NJ, 1976).
- 1026 111.Shebilske, W. in *Understanding language* (ed. Massaro, D.) 291-311 (Academic Press,  
1027 New York, 1975).
- 1028 112.Bouma, H., & De Voogd, A.H. On the control of eye saccades in reading. *Vision Res.* **14**,  
1029 273-284 (1974).
- 1030 113.Haber, R.N. in *Eye movements and psychological processes* (eds. Monty, R.A. & Senders,  
1031 J.W.) (Erlbaum, Hillsdale, NJ, 1976).
- 1032 114.Buswell, G.T. An experimental study of the eye-voice span in reading. *Suppl. Educ.*  
1033 *Monogr.* **17** (1920).
- 1034 115.Buswell, G.T. *Fundamental Reading Habits, a Study of their Development* (Chicago  
1035 University Press, 1922).
- 1036 116.Buswell, G.T. How adults read. *Suppl. Educ. Monogr.* **45** (1937).
- 1037 117.Kolers, P.A. in *Eye movements and psychological processes* (eds. Monty, R.A. & Senders,  
1038 J.W.) 371-395 (Erlbaum, Hillsdale, NJ, 1976).
- 1039 118.Liu, Y., Huang, R., Gao, D. & Reichle, E.D. Further tests of a dynamic-adjustment account  
1040 of saccade targeting during the reading of Chinese. *Cogn. Sci.* **41(6)**, 1624-1287 (2017).
- 1041 119.Li, X., Liu, P. & Rayner, K. (2011). Eye movement guidance in Chinese reading: Is there  
1042 a preferred viewing location? *Vision Res.* **51**, 1146-1156.
- 1043 120.Rayner, K., Li, X.S. & Pollatsek A. Extending the E-Z Reader model of eye movement  
1044 control to Chinese readers. *Cogn. Sci.* **31**: 1021–1033 (2007).
- 1045 121.Engbert, R. & Krügel, A. Readers use Bayesian estimation for eye-movement control.  
1046 *Psychol. Sci.* **21**, 366-371 (2010).
- 1047 122.Kerr, P.W. *Eye movement control during reading: The selection of where to send the eyes.*  
1048 University of Illinois at Urbana-Champaign (1992).



- 1049 123. McConkie, G.W., Kerr, P.W. & Dyre, B.P. in *Eye movements in reading* (eds. Ygge, J. &  
1050 Lennerstrand, G.) 315-328 (Pergamon Press, Oxford, 1994).
- 1051 124. Feng, G. Eye movements as time-series random variables: A stochastic model of eye-  
1052 movement control in reading. *Cogn. Syst. Res.* **7**, 70-95 (2006).
- 1053 125. New, B., Pallier, C., Ferrand, L. & Matos, R. Une base de données lexicales du français  
1054 contemporain sur internet: Lexique [A lexical data base of contemporary French on the  
1055 Web: Lexicon]. *L'Année Psychologique* **101**, 447-462 (2001).
- 1056 126. Brysbaert, M., Drieghe, D. & Vitu, F. in *Cognitive Processes in eye guidance* (ed.  
1057 Underwood, G.) 53-77 (Oxford University Press, 2005).
- 1058 127. Rayner, K. & Fischer, M.H. Mindless reading revisited: Eye movements during reading  
1059 and scanning are different. *Percept. Psychophys.* **58(5)**, 734-747 (1996).
- 1060 128. Luke, S.G. & Henderson, J.M. Oculomotor and cognitive control of eye movements in  
1061 reading: Evidence from mindless reading. *Atten. Percept. Psychophys.* **75(6)**, 1230-1242  
1062 (2013).
- 1063 129. Tsai, J.L. & McConkie, G.W. in *The mind's eye: Cognitive and applied aspects of eye*  
1064 *movement research* (eds. Hyönä, J., Radach, R. & Deubel, H.) 159-176 (Elsevier, Oxford,  
1065 2003).
- 1066 130. Hyönä, J., Yan, M. & Vainio, S. Morphological structure influences the initial landing  
1067 position in words during reading Finnish. *Q. J. Exp. Psychol.* **71(1)**, 122-130 (2013).
- 1068 131. Lavigne, F., Vitu, F. & d'Ydewalle, G. The influence of semantic context on initial eye  
1069 landing sites in words. *Acta Psychol.* **104**, 191-204 (2000).
- 1070 132. Rayner, K., Reichle, E.D., Stroud, M.J., Williams, C.C. & Pollatsek, A. The effect of word  
1071 frequency, word predictability, and font difficulty on the eye movements of young and  
1072 older readers. *Psychol. Aging* **21(3)**, 448-465 (2006).

- 1073 133. Yan, M. et al. Eye movements guided by morphological structure: Evidence from the  
1074 Uighur language. *Cognition* **132**, 181-215 (2014).
- 1075 134. Zhou, W., Wang, A., Shu, H., Kliegl, R. & Yan, M. Word segmentation by alternating  
1076 colors facilitate eye guidance in Chinese reading. *Mem. Cogn.* **46**, 729-740 (2018).
- 1077 135. Liu, Y., Guo, S., Yu, L., Reichle, E.D. Word predictability affects saccade length in  
1078 Chinese reading: An evaluation of the dynamic-adjustment model. *Psychon. Bull. Rev.* **25**:  
1079 1891–1899 (2018).
- 1080 136. McConkie, G.W., Kerr, P. W., Reddix, M.D., Zola, D. & Jacobs, A.M. Eye movement  
1081 control during reading: II. Frequency of refixating a word. *Percept. Psychophys.* **46**, 245-  
1082 253 (1989).
- 1083 137. Vitu, F. The influence of parafoveal preprocessing and linguistic context on the optimal  
1084 landing position effect. *Percept. Psychophys.* **50**, 58-75 (1991).
- 1085 138. Nazir, T. On the role of refixations in letter strings: The influence of oculomotor factors.  
1086 *Percept. Psychophys.* **49(4)**, 373-389 (1991).
- 1087 139. Andriessen, J.J. & De Voogd, A.H. Analysis of eye movement patterns in silent reading.  
1088 *IPO Annual Progress Report* **8**, 29-34 (1973).
- 1089 140. Vitu, F. & McConkie, G.W. in *Reading as a perceptual process* (eds. Kennedy, A., Radach,  
1090 R., Heller, D. & Pynte, J.) 301-326 (Elsevier, Oxford, 2000).
- 1091 141. Vitu, F., McConkie, G.W. & Zola, D. in *Eye guidance in reading and scene perception*  
1092 (ed. Underwood, G.) 101-124 (Elsevier Science Ltd, Oxford, 1998).
- 1093 142. Vitu, F. in *Cognitive processes in eye guidance* (ed. Underwood, G.) 1-32 (Oxford  
1094 University Press, 2005).
- 1095 143. Radach, R. & McConkie, G.W. in *Eye guidance in reading and scene perception* (ed.  
1096 Underwood, G.) 77-100 (Elsevier Science Ltd, Oxford, 1998).

- 1097 144.Laurinavichyute, A.K., Sekerina, I.A., Alexeeva, S., Bagdasaryan, K. & Kliegl, R. Russian  
1098 sentence corpus: Benchmark measures of eye movements in reading in Russian. *Behav.*  
1099 *Res. Methods* **51**, 1161-1178 (2019).
- 1100 145.Deutsch, A. & Rayner, K. Initial fixation location effects in reading Hebrew words. *Lang.*  
1101 *Cognitive Proc.* **14**, 393-421 (1999).
- 1102 146.Hyönä, J. & Bertram, R. Optimal viewing position effects in reading Finnish. *Vision Res.*  
1103 **51**, 1279-1287 (2011).
- 1104 147.Nuthmann, A., Engbert, R. & Kliegl, R. Mislocated fixations during reading and the  
1105 inverted optimal viewing position effect. *Vision Res.* **45**, 2201-2217 (2005).
- 1106 148.Radach, R. & Kempe, V. in *Perception and cognition: Advances in eye movement research*  
1107 (eds. d'Ydewalle, G. & Van Rensbergen, J.) 213-225 (North-Holland, Amsterdam, New  
1108 York, 1993).
- 1109 149.Paterson, K.B., Almabruk, A.A.A., McGowan, V.A., White, S.J. & Jordan, T.R. Effects of  
1110 word length on eye movement control: The evidence from Arabic. *Psychon. Bull. Rev.* **22**,  
1111 1443-1450 (2015).
- 1112 150.Kajii, N., Nazir, T.A. & Osaka, N. Eye movement control in reading unspaced text: The  
1113 case of the Japanese script. *Vision Res.* **41**, 2503-2510 (2001).
- 1114 151.Sainio, M., Hyönä, J., Bingushi, K. & Bertram, R. The role of inter-word spacing in reading  
1115 Japanese: An eye movement study. *Vision Res.* **47**, 2575–2584 (2007).
- 1116 152.Rayner, K., Sereno, S.C. & Raney, G.E. Eye movement control in reading: A comparison  
1117 of two types of models. *J. Exp. Psychol. Hum. Percept. Perform.* **22(5)**, 1188-1200 (1996).
- 1118 153.Vitu, F., McConkie, G.W., Kerr, P. & O'Regan, J.K. Fixation location effects on fixation  
1119 durations during reading: An inverted optimal viewing position effect. *Vision Res.* **41**,  
1120 3513-3533 (2001).

- 1121 154. Vitu, F., O'Regan, J.K. & Mittau, M. Optimal landing position in reading isolated words  
1122 and continuous text. *Percept. Psychophys.* **47(6)**, 583-600 (1990).
- 1123 155. Epelboim, J., Booth, J.R. & Steinman, R.M. Reading unspaced text: Implications for  
1124 theories of reading eye movements. *Vision Res.* **34**, 1735-1766 (1994).
- 1125 156. McGowan, V.A., White, S.J., Jordan, T.R. & Paterson, K.B. Aging and the use of interword  
1126 spaces during reading: Evidence from eye movements. *Psychon. Bull. Rev.*, **21(3)**, 740-747  
1127 (2014).
- 1128 157. Mirault, J., Snell, J. & Grainger, J. Reading without spaces revisited: The role of word  
1129 identification and sentence-level constraints. *Acta Psychol.* **195**, 22-29 (2019).
- 1130 158. Perea, M. & Acha, J. Space information is important for reading. *Vision Res.* **49**, 1994–  
1131 2000 (2009).
- 1132 159. Rayner, K., Fischer, M.H. & Pollatsek, A. Unspaced text interferes with both word  
1133 identification and eye movement control. *Vision Res.* **38**, 1129-1144 (1998).
- 1134 160. Rayner, K., Yang, J., Schuett, S. & Slattery, T. Eye movements of older and younger  
1135 readers when reading unspaced text. *Exp. Psychol.* **60(5)**, 354-361 (2013).
- 1136 161. Veldre, A., Drieghe, D. & Andrews, S. Spelling ability selectively predicts the magnitude  
1137 of disruption in unspaced text reading. *J. Exp. Psychol. Hum. Percept. Perform.* **43(9)**,  
1138 1612-1628 (2017).
- 1139 162. Sheridan, H., Rayner, K. & Reingold, E.M. Unsegmented text delays word identification:  
1140 Evidence from a survival analysis of fixation durations. *Vis. Cogn.* **21(1)**, 38-60 (2013).
- 1141 163. Bai, X.J., Yan, G.L., Liversedge, S.P., Zang, C.L. & Rayner, K. Reading spaced and  
1142 unspaced Chinese text: Evidence from eye movements. *J. Exp. Psychol. Hum. Percept.*  
1143 *Perform.* **34(5)**, 1277–1287 (2008).
- 1144 164. Shen, D. et al. Eye movements of second language learners when reading spaced and  
1145 unspaced Chinese text. *J. Exp. Psychol. Appl.* **18**, 192–202 (2012).

- 1146 165. Morris, R.K., Rayner, K. & Pollatsek, A. Eye movement guidance in reading: The role of  
1147 parafoveal letter and space information. *J. Exp. Psychol. Hum. Percept. Perform.* **16**, 268-  
1148 281 (1990).
- 1149 166. Pollatsek, A. & Rayner, K. Eye movement control in reading: The role of word boundaries.  
1150 *J. Exp. Psychol. Hum. Percept. Perform.* **8(6)**, 817-833 (1982).
- 1151 167. McConkie, G.W. & Rayner, K. The span of the effective stimulus during a fixation in  
1152 reading. *Percept. Psychophys.* **17**, 578-586 (1975).
- 1153 168. Winsky, H., Radach, R. & Luksaneeyanawin, S. Eye movements when reading spaced and  
1154 unspaced Thai and English: A comparison of Thai-English bilinguals and English  
1155 monolinguals. *J. Mem Lang.* **61**, 339-351 (2009).
- 1156 169. Zang, C., Liang, F., Bai, X., Yan, G. & Livesedge, S.P. Interword spacing and landing  
1157 position effects during Chinese reading in children and adults. *J. Exp. Psychol. Hum.*  
1158 *Percept. Perform.* **39(3)**, 720-734 (2013).
- 1159 170. Yan, M. & Kliegl, R. CarPrice versus CarpRice: Word boundary ambiguity influences  
1160 saccade target selection during the reading of Chinese sentences. *J. Exp. Psychol. Learn.*  
1161 *Mem. Cogn.* **42(11)**, 1832-1838 (2016).
- 1162 171. Inhoff, A.W. & Wu, C. Eye movements and the identification of spatially ambiguous words  
1163 during Chinese sentence reading. *Mem. Cogn.* **33(8)**, 1345-1356 (2005).
- 1164 172. Bullimore, M.A. & Bailey, I.L. Reading and eye movements in age-related maculopathy.  
1165 *Optom. Vis. Sci.* **72(2)**, 125-138 (1995).
- 1166 173. Kolars, P.A., Duchnick, R.L. & Ferguson, D.C. Eye movement measurement of  
1167 readability of CRT displays. *Hum. Factors* **23(5)**, 517-527 (1981).
- 1168 174. Morrison, R.E. & Rayner, K. Saccade size in reading depends upon character spaces and  
1169 not visual angle. *Percept. Psychophys.* **30**, 395-396 (1981).

- 1170 175. Paterson, D.G. & Tinker, M.A. The effect of typography upon the perceptual span in  
1171 reading. *Am. J. Psychol.* **60(3)**, 388-396 (1947).
- 1172 176. Lamare, M. Des mouvements des yeux dans la lecture. *Bull. Mem. Soc. Fr. Ophtalmol.* **10**,  
1173 354-364 (1892).
- 1174 177. Landolt, E. Nouvelles recherches sur la physiologie des mouvements des yeux. *Archives*  
1175 *d'Ophtalmologie, Sept-oct.*, 385-395 (1891).
- 1176 178. O'Regan, J.K., Lévy-Schoen, A. & Jacobs, A. The effect of visibility on eye movement  
1177 parameters in reading. *Percept. Psychophys.* **34**, 457-464 (1983).
- 1178 179. Yan, M., Zhou, W., Shu, H. & Kliegl, R. Perceptual span depends on font size during the  
1179 reading of Chinese sentences. *J. Exp. Psychol. Learn. Mem. Cogn.* **41(1)**, 209–219 (2015).
- 1180 180. Franken, G., Podlasek, A. & Mozina, K. Eye-tracking study of reading speed from LCD  
1181 displays: Influence of type style and type size. *J. Eye Movement Res.* **8(1):3**, 1-8 (2015).
- 1182 181. Yen, N.-S., Tsai, J.-L., Chen, P.-L., Lin, H.-Y. & Chen, A.L.P. Effects of typographic  
1183 variables on eye-movement measures in reading Chinese from a screen. *Behav. Inform.*  
1184 *Technol.* **30(6)**, 797-808 (2011).
- 1185 182. McDonald, S.C. Effects of number-of-letters on eye movements during reading are  
1186 independent from effects of spatial word length. *Vis. Cogn.* **13(1)**, 89-98 (2006).
- 1187 183. Hautala, J., Hyönä, J. & Aro, M. Dissociating spatial and letter-based word length effects  
1188 observed in readers' eye movement patterns. *Vision Res.* **51**, 1719-1727 (2011).
- 1189 184. Vonk, W., Radach, R. & van Rijn, H. in *Reading as a perceptual process* (eds. Kennedy,  
1190 A., Radach, R., Heller, D. & Pynte, J.) 269–299 (Elsevier, Oxford, 2004).
